# 1 The Rab11 effectors Fip5 and Fip1 regulate zebrafish intestinal development

2

3 Cayla E. Jewett<sup>1</sup>, Bruce H. Appel<sup>2</sup>, and Rytis Prekeris<sup>1,3</sup>

4 <sup>1</sup> Department of Cell and Developmental Biology, University of Colorado School of Medicine, Aurora, Colorado 80045 USA

5 <sup>2</sup> Department of Pediatrics, University of Colorado School of Medicine, Aurora, Colorado 80045 USA

6 <sup>3</sup> Correspondence should be addressed to Rytis.Prekeris@cuanschutz.edu

7

8 **KEYWORDS:** FIP5, FIP1, Rip11, RCP, Rab11, microvilli, keratin, Rab7, MVID

9

10 **ABBREVIATIONS:** Microvillus inclusion disease (MVID), Rab11-Family Interacting Protein (FIP), days  
11 post-fertilization (dpf), Madin Darby Canine Kidney (MDCK)

12

## 13 **ABSTRACT**

14 The Rab11 apical recycling endosome pathway is a well-established regulator of polarity and  
15 lumen formation; however, Rab11-vesicular trafficking also directs a diverse array of other cellular  
16 processes, raising the question of how Rab11 vesicles achieve specificity in space, time, and content of  
17 cargo delivery. In part, this specificity is achieved through effector proteins, yet the role of Rab11 effector  
18 proteins *in vivo* remains vague. Here, we use CRISPR/Cas9 gene editing to study the role of the Rab11  
19 effector Fip5 during zebrafish intestinal development. Zebrafish contain two paralogous genes, *fip5a* and  
20 *fip5b*, that are orthologs of human *FIP5*. We find that *fip5a* and *fip5b* mutant fish show phenotypes  
21 characteristic of microvillus inclusion disease, including microvilli defects, inclusion bodies, and  
22 lysosomal accumulation. Single and double mutant analysis suggest that *fip5a* and *fip5b* function in  
23 parallel and regulate apical trafficking pathways required for assembly of keratin at the terminal web.  
24 Remarkably, in some genetic backgrounds, the absence of Fip5 triggers protein upregulation of a closely  
25 related family member, Fip1. This compensation mechanism occurs both during zebrafish intestinal  
26 development and in tissue culture models of lumenogenesis. In conclusion, our data implicate the Rab11  
27 effectors Fip5 and Fip1 in a trafficking pathway required for apical microvilli formation.

28

## 29 INTRODUCTION

30 Development of many organs, such as the gastrointestinal system, kidneys, and respiratory tract  
31 requires morphogenetic remodeling of cells to form a hollow tube, or lumen (Jewett and Prekeris, 2018).  
32 Whereas the mechanisms cells use to form a lumen vary by organ, a common feature is that cells adopt  
33 a highly polarized conformation including establishment of apical structures such as primary cilia, motile  
34 cilia, or microvilli (Apodaca and Gallo, 2013). Intestinal epithelia are one of the few vertebrate cell types  
35 to lack primary cilia, but their apical cell surface is covered with a brush border composed of actin-rich  
36 membrane protrusions called microvilli to aid in nutrient absorption (Apodaca and Gallo, 2013). The  
37 molecular basis of cell polarization is well defined, but much less is understood about how trafficking  
38 pathways govern formation of these apical structures, especially *in vivo*.

39 The Rab11 apical recycling endosome pathway is a well-established regulator of polarity and  
40 lumen formation (Jewett and Prekeris, 2018). However, Rab11-directed trafficking events are also  
41 implicated in a number of other cellular processes, raising the question of how Rab11 vesicles achieve  
42 specificity when involved in numerous cellular functions. In part, Rab specificity is achieved through  
43 interaction with effector proteins, and Rab11 in particular interacts with a family of effector proteins called  
44 Rab11-Family Interacting Proteins (FIPs) (Horgan and McCaffrey, 2009). There are five FIP family  
45 members, all of which contain a coiled-coil region at the C-terminus of the protein, allowing dimerization  
46 and binding to two Rab11 molecules, effectively forming a functional heterotetramer. Different FIPs  
47 appear to function in unique cellular processes including cytokinesis (FIP3 and FIP4), ciliogenesis (FIP3),  
48 and cargo recycling to the cell surface (FIP1, FIP2, FIP5) (Horgan and McCaffrey, 2009). Previously, our  
49 lab implicated FIP5 in apical lumen formation in 3D Madin Darby Canine Kidney (MDCK) cell culture. We  
50 and others have shown that Rab11-FIP5 endosomes are required for lumenogenesis and interact with  
51 the actin binding protein MYO5B to traffic cargo to the apical cell surface (Lapierre et al., 2001,  
52 Willenborg et al., 2011, Mangan et al., 2016). However, whether FIP5 plays a role in coordinating lumen  
53 morphogenesis during development *in vivo* is unknown.

54 Polarization is critical for cell function such that polarity disruption results in a number of diseases.  
55 Microvillus Inclusion Disease (MVID) is one such example, arising from the inability to form and maintain

56 microvilli at the apical cell surface (Al-Daraji et al., 2010). Patients with MVID suffer from intractable  
57 diarrhea and malabsorption due to absent or very sparse microvilli and typically do not live past  
58 childhood. At the cellular level, patients display characteristic trafficking defects of lysosome  
59 accumulation and inclusion bodies containing microvilli (Phillips et al., 1985, Phillips and Schmitz, 1992,  
60 Ruemmele et al., 2006). Mutations in MYO5B are found in patients with MVID and mutations in the  
61 zebrafish ortholog *myoVb* (also called *goosepimples*), result in inclusion bodies and trafficking defects  
62 (Müller et al., 2008, Ruemmele et al., 2010, Sidhaye et al., 2016). Moreover, experiments from intestinal  
63 tissue culture models suggest that the interaction between Rab11 and MYO5B is essential for microvilli  
64 maintenance (Knowles et al., 2014). Given that FIP5 interacts with MYO5B and is required for lumen  
65 formation in tissue culture, we hypothesized that FIP5 regulates intestinal development and microvilli  
66 formation *in vivo*.

67

## 68 **RESULTS AND DISCUSSION**

69       The mechanisms by which cells polarize and form an apical lumen have been studied extensively  
70 in 3D tissue culture, but whether these processes are recapitulated *in vivo* is unclear, because vertebrate  
71 models are inherently more complex and have compensatory mechanisms. Furthermore, intestinal tissue  
72 culture models are limited due to a lack of proper microvilli that are subject to the stresses and strains  
73 encountered by a functional animal intestine. To address these limitations, we utilized zebrafish intestinal  
74 development as an *in vivo* model of lumenogenesis and microvilli formation. We first examined the  
75 degree to which zebrafish Fip5 protein was conserved with human and dog FIP5 protein, as most work  
76 on FIP5 during cell polarization has been performed in MDCK cells. Zebrafish contain Fip5a and Fip5b  
77 orthologs to mammalian FIP5 with two highly conserved functional domains: a phospholipid-binding  
78 domain C2 domain at the N-terminus and a coiled-coil region at the C-terminus of the protein (Figure  
79 S1A, yellow and blue highlight, respectively) required for dimerization and binding to Rab11 (Prekeris et  
80 al., 2001). Zebrafish intestinal development begins around 3 days post-fertilization (dpf) when many  
81 small lumens develop throughout the intestinal tract and subsequently fuse to form a single continuous  
82 lumen from mouth to anus (Ng et al., 2005, Alvers et al., 2014). To determine where *fip5a* and *fip5b* were

83 expressed in zebrafish larvae during development, we performed *in situ* hybridization on 4 dpf larvae.  
84 Luminal organs such as the intestine, spinal cord, and notochord expressed *fip5a* and *fip5b* (Figure S2A,  
85 B). In measuring mRNA levels of *fip5a* and *fip5b*, we found that both transcripts showed increased levels  
86 around 3 dpf, and high levels of *fip5b* mRNA persisted throughout 8 dpf (Figure S2C). We thus focused  
87 our efforts first on *fip5b*.

88

## 89 **Endosome maturation and terminal web keratin organization require Fip5b function**

90 To study the function of Fip5b, we used CRISPR/Cas9 gene editing. We selected two different  
91 *fip5b* alleles that introduced a premature stop codon right after the C2 domain at the N-terminus (Figure  
92 1A, Figure S1B), thereby eliminating the Rab-binding domain (RBD) at the C-terminus essential for Fip5  
93 function. We maintained these *fip5b* mutant stocks in a heterozygous state and performed intercrosses  
94 to generate zygotic mutants for analysis. Stage matched wild-type siblings were used as controls. We  
95 performed qRT-PCR to measure *fip5b* expression in *fip5b<sup>CO40</sup>* homozygous mutant larvae and observed  
96 an almost complete loss of *fip5b* mRNA levels (Figure 1B), suggestive of nonsense-mediated decay.  
97 *fip5b<sup>CO40</sup>* homozygous mutant fish appeared morphologically normal from embryo through adulthood and  
98 were homozygous viable as adults. However, to determine if loss of Fip5b affected intestinal  
99 development at the cellular level, we performed transmission electron microscopy on fixed sections  
100 through the midgut region (Figure 1C, yellow box) at developmental time points. At 3 dpf, when intestinal  
101 lumen morphogenesis initiated, *fip5b<sup>CO40</sup>* mutant larvae formed a single lumen (Figure 1D), but upon  
102 closer examination, we noticed an accumulation of membrane vesicles in the subapical cytoplasm not  
103 present in wild type larvae (Figure 1E yellow box, F). These vesicles resembled inclusion bodies which  
104 are pathological hallmarks of MVID. At 6 dpf when intestinal development was mostly complete (Ng et  
105 al., 2005), inclusion-like bodies were no longer evident near the subapical surface, consistent with  
106 MYO5B mutant mice in which microvillus inclusions were more pronounced in neonates and disappeared  
107 after weaning due to decreased apical macropinocytosis (Knowles et al., 2014, Weis et al., 2016).  
108 Instead, intestinal cells of homozygous mutant larvae showed an accumulation of small (less than  
109 500nm) apical vesicles (Figure 1G, H) and large (greater than 500nm) organelles that resided medially in

110 the cells (Figure 1G arrows, I) compared to wild-type cells which did not show an accumulation of  
111 intracellular vesicles. Moreover, microvilli were shorter in both the anterior intestinal bulb and posterior  
112 midgut of 6 dpf homozygous mutant fish compared to wild-type siblings (Figure 1G, J). Finally, the  
113 terminal web, an apical cytoskeletal network anchoring microvilli into the cell, was disrupted in mutant  
114 fish. Wild-type larvae had a defined electron dense line at the base of the microvilli and an organelle-free  
115 zone just below the apical cell surface which was absent in mutants (Figure 1G, brackets). These data  
116 revealed trafficking and microvilli defects in *fip5b<sup>CO40</sup>* mutant larvae.

117 To investigate the identity of the large organelles observed in *fip5b<sup>CO40</sup>* mutant larvae intestinal  
118 cells, we performed immunohistochemistry to detect proteins that serve as common endosome markers.  
119 Because Fip5 binds Rab11 vesicles, we first examined Rab11 localization. In wild-type intestinal cells,  
120 Rab11 vesicles localized just beneath the apical cell surface, as revealed by actin staining (Figure 1K). In  
121 contrast, Rab11 vesicles mislocalized to the basolateral surface of intestinal cells in *fip5b<sup>CO40</sup>* mutant  
122 larvae (Figure 1K). Because the large organelles observed through electron microscopy in mutant tissue  
123 were near the apical cell surface, they were unlikely to be Rab11-positive. Intestinal cells of MVID  
124 patients accumulate lysosomal granules (Iancu et al., 2007), so we next stained cells to detect the late  
125 endosome/lysosome marker Rab7. Notably, Rab7-positive organelles accumulated near the apical cell  
126 surface in *fip5b<sup>CO40</sup>* mutant cells, whereas we did not detect these large organelles in wild-type cells  
127 (Figure 1L). These Rab7 endosomes were consistent in size and localization with the structures revealed  
128 by electron microscopy (Figure 1M). Taken together, these data suggested that Fip5b is required for  
129 Rab11 apical localization and Rab7 endosomal trafficking processes.

130 Our electron microscopy analysis also revealed defects in microvilli length and the terminal web  
131 in *fip5b<sup>CO40</sup>* mutant cells. The terminal web is composed of actin and intermediate filaments and is  
132 located just below the apical cell surface to anchor the base of microvilli into the cell (Mooseker et al.,  
133 1984). Because actin localized to the apical cell surface of mutant cells similar to wild-type cells (Figure  
134 1K, L, N), we focused our attention on intermediate filaments. In polarized epithelia, intermediate  
135 filaments are composed of keratin polymers, so we stained cells with a pan-cytokeratin antibody to  
136 visualize intermediate filaments comprising the terminal web. We found that in wild-type cells, the keratin

137 network resided just below the apical actin network; however, in *fip5b*<sup>CO40</sup> mutant cells, keratin  
138 mislocalized to lateral and cytoplasmic regions of the cell (Figure 1N, O). These observations were  
139 consistent with the possibility that Fip5b regulates keratin polymerization and terminal web formation at  
140 the apical cell surface.

141 Terminal web defects result in microvilli abnormalities, which can be exacerbated by physical  
142 stress from intestinal activity. We therefore hypothesized that fed mutant larvae would show more severe  
143 microvilli phenotypes than unfed 6 dpf larvae still living off the yolk. To test this, we began feeding the  
144 larvae daily at 7 dpf and then analyzed larvae at 11 dpf. Mutant larvae showed moderate trafficking  
145 defects at 11 dpf (Figure 1P, arrows, Q, R); however, the terminal web defects recovered, and microvilli  
146 were now significantly longer than wild-type siblings (Figure 1P, bracket, S). This phenotypic recovery  
147 was unexpected and perhaps explains in part why adult mutant fish were homozygous viable.  
148 Importantly, these trafficking and microvilli phenotypes were recapitulated in another *fip5b* mutant allele  
149 *fip5b*<sup>CO43</sup> (Figure S1B, S3A-D) indicating that these phenotypes were specific to *fip5b*. Taken together,  
150 these data provided evidence that Fip5b functions in apical trafficking processes and microvilli formation  
151 during zebrafish intestinal development.

152

### 153 ***fip5a* functions similarly to *fip5b* in endosome maturation and terminal web organization**

154 Whereas *fip5b* mutant phenotypes were prominent during early developmental stages, these  
155 mutant fish recovered from these defects and were viable as homozygous adults. One possible  
156 explanation is a compensatory mechanism, perhaps through upregulation of another trafficking pathway,  
157 and an obvious candidate for compensation is the zebrafish *fip5b* paralog, *fip5a*. To test Fip5a's role in  
158 intestinal development, we again used CRISPR to create *fip5a* mutant alleles (Figure 2A, Figure S1C).  
159 *fip5a* mutant stocks were maintained in a heterozygous state and intercrossed to generate zygotic  
160 mutants for analysis. Stage matched wild-type siblings were used as controls. Similar to *fip5b* mutants,  
161 *fip5a*<sup>CO38</sup> homozygous mutant larvae were morphologically normal and viable as homozygous adults. To  
162 study the role of *fip5a* during intestinal development, we performed the same transmission electron  
163 microscopy analysis on fixed sections through the mid-intestinal region. Notably, *fip5a*<sup>CO38</sup> mutant fish

164 recapitulated phenotypes seen in *fip5b* mutant fish. At 3 dpf, *fip5a*<sup>CO38</sup> mutant larvae formed a lumen, but  
165 exhibited subapical organelles resembling inclusion bodies (Figure 1B, C). By 6 dpf, inclusion bodies  
166 cleared, and *fip5a*<sup>CO38</sup> mutant cells now accumulated small apical vesicles (Figure 1D, E) and large  
167 organelles (Figure 1D arrows, F) not present in wild-type larvae. Additionally, midgut microvilli were  
168 shorter (Figure 1D, G) and the terminal web was also disrupted in mutants compared to wild-type larvae  
169 (Figure 1D, brackets). These large organelles were Rab7-positive in *fip5a*<sup>CO38</sup> mutant fish and terminal  
170 web defects appeared to be the result of mislocalized keratin from the apical cell surface (Figure 2H-K).  
171 Again, similar to *fip5b* mutants at 11 dpf, *fip5a*<sup>CO38</sup> mutants maintained trafficking defects (Figure 1L,  
172 arrows, M, N), but unlike *fip5b* mutants, the terminal web defects and shorter microvilli persisted in  
173 *fip5a*<sup>CO38</sup> mutants at 11 dpf (Figure 1L, brackets, O). Importantly, these trafficking and microvilli  
174 phenotypes were recapitulated in another *fip5a* mutant allele, *fip5a*<sup>CO35</sup> (Figure S1C, S3E-H) indicating  
175 that these phenotypes were specific to *fip5a*. Collectively, these data implicated Fip5a in apical trafficking  
176 and microvilli formation and suggested a similar function to Fip5b during zebrafish intestinal  
177 development.

178

### 179 ***fip5a* and *fip5b* double mutants show severe microvilli and trafficking phenotypes**

180 *fip5a* and *fip5b* homozygous mutant larvae showed similar phenotypes, but it remained unclear  
181 whether *fip5a* and *fip5b* function in parallel or through a common pathway. To test this, we created a  
182 *fip5a*; *fip5b* heterozygous mutant line (*fip5a*<sup>CO35/+</sup>; *fip5b*<sup>CO40/+</sup>). This fish line was maintained in a  
183 heterozygous state and intercrossed to generate *fip5a*<sup>CO35/CO35</sup>; *fip5b*<sup>CO40/CO40</sup> homozygous double mutant  
184 embryos for experiments. Wild-type siblings were used as controls. Through electron microscopy  
185 analysis at 6 dpf, *fip5a*<sup>CO35</sup>; *fip5b*<sup>CO40</sup> zygotic double mutant fish showed two classes of phenotypes. The  
186 first was a severe microvilli defect where microvilli density was significantly reduced and the microvilli  
187 that did form were shorter and more heterogeneous in double mutants compared to wild-type larvae  
188 (Figure 3A and A'', braces, C). The second was a severe trafficking phenotype where the majority of the  
189 cell cytosol was filled with giant Rab7-positive organelles (Figure 3A' and A''', arrows, D, E). Double  
190 mutant fish also accumulated small apical vesicles and terminal web defects (Figure 3A''', bracket, F, G)



191 like those seen in single mutants. These phenotypes were not mutually exclusive, as some mutant larvae  
192 displayed both microvilli and trafficking defects. It is worth noting that wild-type siblings also showed mild  
193 microvilli, terminal web, and trafficking defects (Figure 3A-A', brace, bracket, and arrows, respectively),  
194 perhaps suggestive of maternal contribution, as stage-matched wild-type AB fish did not show these  
195 phenotypes (Figure 3B). In addition to these intestinal phenotypes, about 50% of the double mutant  
196 larvae had multiple kidney lumens, whereas wild-type siblings or single *fip5a* or *fip5b* mutant larvae  
197 always had a single continuous kidney lumen (Figure 3H, arrows). Moreover, double mutant animals did  
198 not live past two weeks. Thus, the severity of these double mutant phenotypes suggested that Fip5a and  
199 Fip5b function in parallel in microvilli formation during zebrafish intestinal development through apical  
200 trafficking pathways that regulate terminal web formation.

201

### 202 **Upregulation of Fip1 rescues *fip5a* and *fip5b* double mutant phenotypes**

203 Although larvae deficient for zygotic functions of both *fip5a* and *fip5b* had severe intestinal  
204 phenotypes, contribution of wild-type maternal products to the eggs laid by heterozygous females  
205 potentially partially suppressed the phenotype. To test this possibility, we removed the maternal  
206 contribution of *fip5a* by intercrossing *fip5a*<sup>CO35/CO35</sup>; *fip5b*<sup>CO40/+</sup> adults. We called these maternal-zygotic  
207 double mutants *fip5a*<sup>CO35</sup>; *fip5b*<sup>CO40</sup> *mat*- to differentiate from zygotic double mutants in Figure 3 created  
208 from a heterozygous intercross (Figure 4A versus B). Surprisingly, *fip5a*<sup>CO35</sup>; *fip5b*<sup>CO40</sup> *mat*- larvae,  
209 lacking maternal and zygotic functions of *fip5a* and zygotic functions of *fip5b*, had no intestinal  
210 phenotypes and could not be discerned morphologically from wild-type larvae (Figure 4C). Thus,  
211 removing maternal *fip5a* function suppressed, rather than enhanced, the phenotype of double mutant  
212 larvae.

213 Recent literature has posited a role for compensatory mechanisms due to gene knockout when  
214 the mutant mRNA undergoes nonsense-mediated decay (Rossi et al., 2015, El-Brolosy et al., 2019). One  
215 compensatory mechanism included upregulation of transcripts similar in sequence to the mRNA encoded  
216 by the mutated gene (El-Brolosy et al., 2019). We thus wondered if another Fip family member could be  
217 upregulated in the absence of maternal and zygotic functions of *fip5a* and zygotic functions of *fip5b*.



218 Previous work in our lab showed that both FIP5 and FIP1 bind the same Rab11 vesicles and FIP5  
219 proteomics revealed an interaction with FIP1 (Willenborg et al., 2011, Mangan et al., 2016) (Figure 4D).  
220 We thus used a MDCK tissue culture model of lumenogenesis to ask if FIP1 could compensate for FIP5.  
221 When MDCK cells were grown in an extracellular matrix, the majority of wild-type cells formed a single  
222 continuous lumen inside the cyst of cells; however, most FIP5 and FIP1 double KO cells showed a  
223 multiluminal phenotype and a small percentage showed an inverted polarity phenotype (Figure 4E, F).  
224 These luminal phenotypes were significantly more severe than FIP5 KO alone (Figure 4F).  
225 Correspondingly, Western Blot analysis demonstrated that FIP1 protein levels were upregulated in FIP5  
226 KO cells (Figure 4G, H) and immunohistochemistry experiments with a FIP1 antibody confirmed this  
227 (Figure 4I, Figure S4A). This protein upregulation was specific to FIP1 in FIP5 KO cells, as FIP5 levels  
228 did not increase in FIP1 KO cells (Figure 4G, Figure S4B). Moreover, FIP5 and FIP1 double KO cells did  
229 not show general defects in apical polarity or tight junction formation when grown in a polarized  
230 monolayer (Figure S4C, D), suggesting that FIP5 and FIP1 function were specific to apical trafficking  
231 during lumenogenesis.

232 Given that FIP1 could compensate for FIP5 in epithelial tissue culture, we asked if Fip1 could do  
233 the same *in vivo*. To test this, we performed immunohistochemistry on 6 dpf wild-type, *fip5b*<sup>CO40</sup>,  
234 *fip5a*<sup>CO35</sup>, *fip5b*<sup>CO40</sup>, and *fip5a*<sup>CO35</sup>; *fip5b*<sup>CO40</sup> *mat*- larvae stained for endogenous Fip1 protein. Fip1  
235 staining was mostly absent from wild-type, *fip5b*<sup>CO40</sup> mutant, and *fip5a*<sup>CO35</sup>; *fip5b*<sup>CO40</sup> zygotic double  
236 mutant larvae; however, we observed a significant increase in Fip1 signal in *fip5a*<sup>CO35</sup>; *fip5b*<sup>CO40</sup> *mat*-  
237 larvae, especially at the apical cell surface (Figure 4J, K). This suggested that maternal contribution of  
238 wild-type *fip5a* may influence Fip1 protein levels to compensate for maternal and zygotic loss of Fip5a  
239 together with zygotic loss of Fip5b.

240 Rab11 specificity for a particular cellular pathway is achieved through interacting with effector  
241 proteins, and our work revealed a role for the Rab11 effector paralogs Fip5a and Fip5b in apical cargo  
242 delivery and microvilli formation during zebrafish intestinal development. In particular, we observed  
243 enlarged Rab7-positive, Rab11-negative organelles in mutants. Normally, there is a homeostasis  
244 established between Rab11 recycling from endosomes and maturation from early endosomes to

245 lysosomes (Stenmark, 2009). We propose that without Rab11-Fip5 mediated removal and apical  
246 recycling of essential apical cargo, this homeostasis is disrupted such that cargo to be recycled builds up  
247 and the maturation process is delayed resulting in engorged Rab7-positive organelles.

248 One characteristic of MVID is loss of microvilli at the apical cell surface, yet the mechanism  
249 behind microvilli phenotypes is still being revealed. Work from intestinal tissue culture and MYO5B  
250 mutant mice suggest that disruption of Rab11-mediated recycling of apical membrane proteins and  
251 transporters results in failure to maintain apical polarity (Knowles et al., 2014, Vogel et al., 2015, Weis et  
252 al., 2016). Our work posits an additional potential explanation in the intermediate filament networks. In  
253 polarized epithelia, groups of keratin proteins form polymers at the subapical cell surface just below the  
254 apical actin cortex (Apodaca and Gallo, 2013). These actin and intermediate filament networks together  
255 comprise the terminal web which is responsible for anchoring the microvilli rootlets into the cell. In *fip5*  
256 mutant zebrafish, we observed loss of keratin localization from the apical cell surface to lateral and  
257 cytoplasmic regions. It remains unclear how Fip5 regulates apical keratin localization. Because keratins  
258 are cytosolic proteins whose assembly and disassembly into networks is mediated by phosphorylation  
259 state (Cooper, 2000), one possibility is that Rab11-Fip5 vesicles traffic a keratin kinase or phosphatase  
260 to the site of keratin polymerization thereby regulating network assembly. Alternatively, the effect of Fip5  
261 on intermediate filament polymerization could be a more indirect result of general disruption in  
262 intracellular trafficking events as we see an accumulation of a number of vesicles and larger organelles  
263 in mutant cells. It is interesting to note that in patients with MVID, intractable diarrhea leads to problems  
264 with dehydration and electrolyte balance; however, these fish live in an aquatic environment and balance  
265 electrolytes through the gills which may mitigate some of these critical problems. In conclusion, our work  
266 implicates the Rab11 effectors Fip5 and Fip1 in apical trafficking and microvilli formation during zebrafish  
267 intestinal development.

268

## 269 **ACKNOWLEDGEMENTS**

270 We wish to thank Dr. Alexander Blasky for creating the zebrafish *fip5* mutant lines, Dr. Jennifer Bourne  
271 for processing zebrafish samples for electron microscopy, and Dr. Michel Bagnat for sharing the

272 hsp:GFP:Rab11a zebrafish line. We are grateful to Drs. Todd Blankenship and Jamie Nichols for critical  
273 reading of the manuscript. We are indebted to all members of the Appel lab and the entire zebrafish  
274 community at the Anschutz Medical Campus for sharing their protocols, reagents, and knowledge on  
275 zebrafish biology. This work was funded by an NSF Graduate Research Fellowship Grant No. DGE-  
276 1553798 to C.E.J., Cmic INCLUDE T32 to C.E.J., and NIH 2R01DK064380 to R.P.

277

## 278 AUTHOR CONTRIBUTIONS

279 C.E.J. and R.P. performed experiments. C.E.J., B.H.A., and R.P. conceived experiments, wrote the  
280 manuscript, and secured funding.

281

## 282 FIGURE LEGENDS

283 **Figure 1. Endosome maturation and terminal web keratin organization require Fip5b function.** (A)

284 Domain schematic of zebrafish Fip5b protein containing a C2 domain at the N-terminus and a Rab-  
285 binding domain (RBD) at the C-terminus. The red arrowhead with STOP denotes premature termination  
286 codon in *fip5b* mutant alleles. (B) qRT-PCR for *fip5b* in wild-type and *fip5b*<sup>CO40</sup> mutant larvae at 6 dpf. (C)  
287 6 dpf larvae expressing *Tg(hsp:GFP:Rab11a)* labeling the intestine. The intestinal bulb is denoted by a  
288 bracket and the midgut by a dashed box. All following images are representative cross sections through  
289 the midgut region. Wild-type siblings are used as controls. (D) Electron micrographs showing 3 dpf wild-  
290 type and *fip5b*<sup>CO40</sup> mutant larvae. Luminal space is lighter gray region. (E) High magnification electron  
291 micrographs showing 3 dpf wild-type and *fip5b*<sup>CO40</sup> mutant larvae. Yellow box shows zoomed in view on a  
292 region with subapical inclusion-like bodies. (F) Quantitation of the mean number of inclusion-like bodies  
293 per cell in 3 dpf wild-type and *fip5b*<sup>CO40</sup> mutant larvae. (G) Electron micrographs showing 6 dpf wild-type  
294 and *fip5b*<sup>CO40</sup> mutant larvae. Arrows point to larger than 500nm organelles and brackets mark terminal  
295 web or lack thereof in mutants. (H) Quantitation of less than 500nm apical vesicles in 6 dpf larvae. (I)  
296 Quantitation of greater than 500nm organelles in 6 dpf larvae. (J) Quantitation of microvilli length in the  
297 intestinal bulb and midgut in 6 dpf larvae. (K,L,N) Immunohistochemistry on cross sections of 6 dpf wild-  
298 type and *Fip5b*<sup>CO40</sup> mutant larvae stained with Hoechst (blue), Phalloidin (red), and Rab11 (K), Rab7 (L),

299 or cyokeratin (N) (green). (M) Quantitation of Rab7-vesicle diameter. (O) Ratio of fluorescence intensity  
300 of apical keratin to cytoplasmic keratin. (P) Electron micrographs showing 11 dpf fed wild-type and  
301 *fip5b*<sup>CO40</sup> mutant larvae. Arrows point to larger than 500nm organelles and brackets mark terminal web or  
302 lack thereof in mutants. (Q) Quantitation of less than 500nm apical vesicles in 11 dpf larvae. (R)  
303 Quantitation of greater than 500nm organelles in 11 dpf larvae. (S) Quantitation of microvilli length in the  
304 intestinal bulb and midgut of 11 dpf larvae. All plots show mean with standard error of the mean. A t-test  
305 was used for Gaussian data and a Mann-Whitney test for all other statistics. \*\*\*P < 0.0005, \*\*P < 0.005,  
306 \*P < 0.05.

307

308 **Figure 2. *fip5a* functions similarly to *fip5b* in endosome maturation and terminal web**

309 **organization.** (A) Domain schematic of zebrafish Fip5a protein containing a C2 domain at the N-  
310 terminus and a Rab-binding domain (RBD) at the C-terminus. The red arrowhead with STOP denotes  
311 premature termination codon in *fip5a* mutant alleles. All following images are representative cross  
312 sections through midgut region. Wild-type siblings are used as controls. (B) Electron micrographs  
313 showing 3 dpf wild-type and *fip5a*<sup>CO38</sup> mutant larvae. Yellow box shows zoomed in view on a region with  
314 subapical inclusion-like bodies. (C) Quantitation of the mean number of inclusion-like bodies per cell in 3  
315 dpf wild-type and *fip5a*<sup>CO38</sup> mutant larvae. (D) Electron micrographs showing 6 dpf wild-type and *fip5a*<sup>CO38</sup>  
316 mutant larvae. Arrows point to larger than 500nm organelles and brackets mark terminal web or lack  
317 thereof in mutants. (E) Quantitation of less than 500nm apical vesicles in 6 dpf larvae. (F) Quantitation of  
318 greater than 500nm organelles in 6 dpf larvae. (G) Quantitation midgut microvilli length in 6 dpf larvae.  
319 (H) Immunohistochemistry on cross sections of 6 dpf wild-type and *fip5a*<sup>CO38</sup> mutant larvae stained with  
320 Hoechst (blue), Phalloidin (red), and Rab7 (green). (I) Quantitation of Rab7-vesicle diameter. (J)  
321 Immunohistochemistry on cross sections of 6 dpf wild-type and *fip5a*<sup>CO38</sup> mutant larvae stained with  
322 Hoechst (blue) and cyokeratin (green). (K) Ratio of fluorescence intensity of apical keratin to cytoplasmic  
323 keratin. (L) Electron micrographs showing 11 dpf fed wild-type and *fip5a*<sup>CO38</sup> mutant larvae. Arrows point  
324 to larger than 500nm organelles and brackets mark terminal web or lack thereof in mutants. (M)  
325 Quantitation of less than 500nm apical vesicles in 11 dpf larvae. (N) Quantitation of greater than 500nm

326 organelles in 11 dpf larvae. (O) Quantitation midgut microvilli length in 11 dpf larvae. All plots show mean  
327 with standard error of the mean. A t-test was used for Gaussian data and a Mann-Whitney test for all  
328 other statistics. \*\*\*P < 0.0005, \*P < 0.05.

329

330 **Figure 3. *fip5a* and *fip5b* double mutants show severe microvilli and trafficking phenotypes.** All  
331 following images are representative cross sections through the midgut region of 6 dpf larvae. (A-A''')  
332 Electron micrographs showing wild-type siblings and *fip5a*<sup>CO35/CO35</sup>; *fip5b*<sup>CO40/CO40</sup> zygotic mutant larvae.  
333 Arrows point to larger than 500nm organelles, braces point out sparse microvilli, and brackets mark  
334 terminal web or lack thereof in mutants. N indicates number of representative larvae out of total number  
335 of larvae analyzed. (B) Electron micrograph showing wild-type AB larva. (C) Quantitation of microvilli  
336 density. (D) Immunohistochemistry on cross sections of wild-type and *fip5a*<sup>CO35</sup>; *fip5b*<sup>CO40</sup> mutant larvae  
337 stained with Hoechst (blue), Phalloidin (red), and Rab7 (green). (E) Quantitation of Rab7-vesicle  
338 diameter. (F) Immunohistochemistry on cross sections of wild-type and *fip5a*<sup>CO35</sup>; *fip5b*<sup>CO40</sup> mutant larvae  
339 stained with Hoechst (blue), Phalloidin (red) and cytokeratin (green). (G) Ratio of fluorescence intensity  
340 of apical keratin to cytoplasmic keratin. (H) Electron micrographs of kidneys in wild-type, *fip5b*<sup>CO40</sup>  
341 mutant, *fip5a*<sup>CO35</sup> mutant, and *fip5a*<sup>CO35</sup>; *fip5b*<sup>CO40</sup> double mutant larvae. N indicates number of  
342 representative kidneys out of total number of kidneys analyzed. Arrows point to multiple lumens in  
343 *fip5a*<sup>CO35</sup>; *fip5b*<sup>CO40</sup> double mutant larvae. All plots show mean with standard error of the mean. A t-test  
344 was used for Gaussian data and a Mann-Whitney test for all other statistics. \*\*\*P < 0.0005.

345

346 **Figure 4. Upregulation of Fip1 rescues *fip5a* and *fip5b* double mutant phenotypes.** (A-B) Schematic  
347 of genetic crosses resulting in *fip5a*<sup>CO35</sup>; *fip5b*<sup>CO40</sup> double zygotic or maternal/zygotic (mat-) mutant  
348 offspring generated from two different parental genotypes. (C) Electron micrographs showing cross  
349 sections through midgut of 6 dpf wild-type AB and *fip5a*<sup>CO35</sup>; *fip5b*<sup>CO40</sup> mat- mutant larvae. (D) Cartoon  
350 schematic showing FIP5 and FIP1 bind same Rab11 vesicles. (E) Wild-type and FIP5; FIP1 double KO  
351 MDCK cells grown in an extracellular matrix to induce 3D lumen formation. Arrows denote multiple  
352 lumens in KO cyst. (F) Quantitation of luminal phenotypes. (G) Western Blot on wild-type and KO MDCK

353 cell lysates probed for FIP1, FIP5 or tubulin (control) antibodies. (H) Quantitation of FIP1 band intensity  
354 for wild-type and FIP5 KO cell lysates. (I) Quantitation of FIP1 fluorescence intensity in wild-type and  
355 FIP5 KO cells grown in polarized monolayers. Representative images are shown in Figure S4A. (J)  
356 Immunohistochemistry on cross sections through midgut of 6 dpf wild-type, *fip5b*<sup>CO40</sup> mutant, *fip5a*<sup>CO35</sup>;  
357 *fip5b*<sup>CO40</sup> double mutant, and *fip5a*<sup>CO35</sup>; *fip5b*<sup>CO40</sup> *mat*- mutant larvae stained with Hoechst (blue),  
358 Phalloidin (red) and Fip1 (green). (K) Quantitation of fluorescence intensity of Fip1. All plots show mean  
359 with standard error of the mean. A t-test was used for Gaussian data and a Mann-Whitney test for all  
360 other statistics. \*\*\*P < 0.0005, \*P < 0.05.

361

362 **Supplemental Figure 1.** (A) Protein alignments for human FIP5, dog FIP5, and zebrafish paralogs Fip5a  
363 and Fip5b. The yellow highlighted region denotes the C2 domain and the blue highlighted region denotes  
364 the Rab-binding domain. (B) Fip5b exon 2 sequence in wild-type, *fip5b*<sup>CO40</sup> mutant, and *fip5b*<sup>CO43</sup> mutant  
365 alleles. Red amino acids show where mutants differ from wild-type allele. (C) Fip5a exon 1 sequence in  
366 wild-type, *fip5a*<sup>CO35</sup> mutant, and *fip5a*<sup>CO38</sup> mutant alleles. Red amino acids show where mutants differ  
367 from wild-type allele.

368

369 **Supplemental Figure 2.** *In situ* hybridization on 4 dpf larvae with antisense probes for the coding  
370 sequences of *fip5a* and *fip5b* (left panel) and the 3' UTR sequences of *fip5a* and *fip5b* (right panel). (B)  
371 Representative cross sections of *fip5a* and *fip5b* antisense coding sequence probes. (C) qRT-PCR  
372 measuring *fip5a* and *fip5b* transcript levels at 2, 3, 5, and 8 dpf normalized to levels at 2 dpf. All plots  
373 show mean with standard error of the mean.

374

375 **Supplemental Figure 3.** All following images are representative cross sections through midgut region on  
376 6 dpf larvae. Wild-type siblings are used as controls. (A) Electron micrographs showing wild-type and  
377 *fip5b*<sup>CO43</sup> mutant larvae. (B) Quantitation of less than 500nm apical vesicles. (C) Quantitation of greater  
378 than 500nm organelles. (D) Quantitation of midgut microvilli length. (E) Electron micrographs showing  
379 wild-type and *fip5a*<sup>CO35</sup> mutant larvae. (F) Quantitation of less than 500nm apical vesicles. (G)

380 Quantitation of greater than 500nm organelles. (H) Quantitation of midgut microvilli length.

381

382 **Supplemental Figure 4.** (A) Wild-type, FIP5 KO, FIP1 KO, and FIP5 and FIP1 double KO MDCK cells  
383 grown in polarized monolayers and stained for Hoechst (blue), Phalloidin (red) and Fip1 (green). (B)  
384 Wild-type, FIP1 KO, FIP5 KO, and FIP5 and FIP1 double KO MDCK cells grown in polarized monolayers  
385 and stained for Hoechst (blue), Phalloidin (red) and Fip5 (green). (C) Wild-type and FIP5 and FIP1  
386 double KO MDCK cells grown in polarized monolayers and stained for Hoechst (blue), the tight junction  
387 marker Cingulin (red) and the apical membrane marker GP135 (green). (D) Trans-epithelial resistance  
388 measurements on wild-type, FIP5 KO, FIP1 KO, and FIP5 and FIP1 double KO MDCK cells grown in  
389 polarized monolayers.



## 390 **MATERIALS AND METHODS**

### 391 *Zebrafish husbandry*

392 All stocks unless otherwise specified were maintained in a heterozygous state and kept according to  
393 Standard Operating Procedure defined in "The Zebrafish Book" (M. Westerfield, Inst. of Neuroscience,  
394 Univ. of Oregon).

395

### 396 *qRT-PCR*

397 RNA extraction from larvae was performed with TRIzol reagent (Invitrogen) followed by cDNA synthesis  
398 with iScript cDNA Synthesis Kit (BioRad). SYBR Green PCR Master Mix (Applied Biosystems) was used  
399 for qPCR. All reactions were performed in technical triplicate and a minimum of three biological replicates  
400 were performed. Primer sequences are listed in Table 2.

401

### 402 *Protein alignments*

403 Fip5 protein alignments were generated using T-Coffee and Boxshade 3.2. The following protein  
404 accession numbers from NCBI were used for alignments: Human NP\_056285; Dog XP\_003639656  
405 (isoform X5); Zebrafish Fip5a XP\_009305489 (isoform X2); Zebrafish Fip5b XP\_017214658 (rab11  
406 family-interacting protein 5-like isoform X2).

407

### 408 *Zebrafish Immunohistochemistry*

409 Larvae were placed in 1-2% Tricaine for 10 minutes or until they were unresponsive to touch then  
410 decapitated immediately posterior to the otic vesicle using a scalpel. The larva body was placed in fix  
411 solution (4% paraformaldehyde, 4% sucrose, 0.15 mM CaCl<sub>2</sub>, pH 7.3) at 4°C overnight, whereas the  
412 head was placed in lysis buffer and genotyped (see genotyping). The fixed larvae were then embedded  
413 in a melted agar solution (1.5% agar, 5% sucrose in water), and after the blocks hardened, they were  
414 trimmed and immersed in 30% sucrose in water solution overnight at 4°C. Blocks were then dried with a  
415 chemwipe, frozen on dry ice for ~15 minutes, then stored at -80°C until ready to section.

416 Blocks were mounted in OCT and 20um sections cut using a Leica CM 1950 cryostat microtome.

417 Sections were placed on FisherBrand charged slides (Cat # 12-550-15) and rehydrated in PBS for 30  
418 minutes. Excess liquid was dried, and then a wax pen was used to draw around the edge of the slide.  
419 Slides were then blocked with 2% BSA and 5% donkey serum (ThermoFisher Cat # NC9624464) in PBS  
420 for 1 hour, then incubated in primary antibody (see antibodies in Table 1) diluted in block at room  
421 temperature for 2-3 hours. Slides were then washed 4x 15 minutes each with PBS and incubated in  
422 secondary antibody (see antibodies in Table 1) diluted in block for 1-2 hours at room temperature. Slides  
423 were again washed 4x 15 minutes each with PBS, adding Hoescht (ThermoFisher Cat # 33342 at 1:500)  
424 to the second to last wash. Slides were then dried, mounted in Vectashield (Vector Laboratories Cat # H-  
425 100), and sealed with nail polish.

426

#### 427 *Widefield Microscopy and Image Analysis*

428 All slides of fixed fish sections were imaged with an inverted Axiovert 200M microscope (Carl Zeiss)  
429 with a 63x oil immersion lens and QE charge-coupled device camera (Sensicam). Images were  
430 acquired using Slidebook 6.0 (Intelligent Imaging Innovations) software. Images were processed using  
431 a combination of Slidebook 6.0 (Intelligent Imaging Innovations) software, Fiji (PMID 22743772), and  
432 Adobe Photoshop. Figures were made in Adobe Illustrator. A minimum of three biological replicates were  
433 performed for each experiment and quantitation was performed unblinded.

434

#### 435 *Genotyping Zebrafish*

436 Fish tissue was isolated from a fin clip for adult fish or from the heads for larvae. Fish tissue was placed  
437 in lysis buffer (10 mM Tris pH 8.3, 50 mM KCl, 1.5 mM MgCl<sub>2</sub>, 0.3% Tween-20, 0.3% NP-40 in water)  
438 with 2% Proteinase K (Invitrogen Cat # 25530049). Lysis reactions were incubated at 55°C for 4 hours,  
439 then 95°C for 20 minutes to inactivate Proteinase K. A PCR/Restriction Enzyme-based assay was used  
440 to genotype *fip5a* and *fip5b* mutant fish lines. For *fip5a*, a 400bp region of genomic DNA surrounding the  
441 CRISPR target site was amplified by PCR. The PCR product was then digested with BssHII for 1 hour at  
442 50°C, and the resulting product was run on a 2% agarose gel. For *fip5b*, a similar schematic was used  
443 with the BsaWI or AgeI restriction enzyme depending on the allele. PCR primer sequences are listed in

444 Table 2. Genotyping was performed prior to experiments and only wild-type and homozygous mutant  
 445 larvae were selected for analysis.

446

447 Table 1: Antibodies

| Name                            | Supplier/Cat #                     | Dilution |
|---------------------------------|------------------------------------|----------|
| Pan cytokeratin AE1/AE3         | Abcam/ab27988                      | 1:50     |
| Rab7                            | Abcam/ ab50533                     | 1:100    |
| Rab11                           | Life Technologies/ 715300          | 1:100    |
| GP135                           | DSHB/ 3F2/D8                       | 1:100    |
| Cingulin                        | Prekeris Lab                       | 1:100    |
| FIP1                            | Prekeris Lab                       | 1:200    |
| FIP5                            | Prekeris Lab                       | 1:100    |
| Alexa 488 Anti-Rabbit secondary | Jackson ImmunoResearch/711-545-152 | 1:100    |
| Alexa 488 Anti-Mouse secondary  | Jackson ImmunoResearch/715-545-150 | 1:100    |
| Alexa-568 Phalloidin            | Invitrogen/A12380                  | 1:100    |

448

449 Table 2: Primer sequences. Primers were designed using the NCBI/Primer-BLAST tool.

|                         |                                               |
|-------------------------|-----------------------------------------------|
| Fip5a ISH For Antisense | TACAACAAACGCCTCCGCTA                          |
| Fip5a ISH Rev Antisense | TAATACGACTCACTATAGGGCGCGTTGTGCAACAAAACC       |
| Fip5b ISH For Antisense | GAAGCGCTCCGTCCCAAATA                          |
| Fip5b ISH Rev Antisense | TAATACGACTCACTATAGGGTGATTCACTACAATCTCAGACCTCA |
| Fip5a genotyping For    | CCACTGTCTTATGTGCCCGT                          |
| Fip5a genotyping Rev    | TGCTCTTCCGATCCTGAAAGG                         |
| Fip5b genotyping For    | GAGAGCTACAGGTCACCATCC                         |
| Fip5b genotyping Rev    | GCTGTAAATCGGTGTTCTGGG                         |
| Fip5aExon1gRNAolig1     | TAGGCCCGAGGGTTGCGCGCGA                        |

|                     |                          |
|---------------------|--------------------------|
| Fip5aExon1gRNAolig2 | AAACTCGCGCGCAACCCTCGGG   |
| Fip5bExon2gRNAolig1 | TAGGTGGAAGAACACCGGAGTA   |
| Fip5bExon2gRNAolig2 | AAACTACTCCGGTGTTCCTTCCA  |
| FIP5Bset1For qPCR   | GGCAAATATTGTTCCGCTCG     |
| FIP5Bset1Rev qPCR   | TTGTTGCGGGTGAAGTGGAT     |
| FIP5Bset2For qPCR   | AAATCCAGGACGATCTGCTCT    |
| FIP5Bset2Rev qPCR   | CGCTGCTTCTTGATCTCCAAT    |
| Rpl13aFor qPCR      | TCTGGAGGACTGTAAGAGGTATGC |
| Rpl13aRev qPCR      | AGACGCACAATCTTGAGAGCAG   |
| GAPDHFor qPCR       | GTGGAGTCTACTGGTGTCTTC    |
| GAPDHRev qPCR       | GTGCAGGAGGCATTGCTTACA    |
| FIP1KO gRNA         | GTGATAACCCAAGGGCACTG     |
| FIP5KO gRNA         | GGGTTTCATTTGGGGTCACAT    |

450

451 *CRISPR/Cas9 in Zebrafish*

452 All primer sequences are listed in Table 2. Guide RNA (gRNA) oligos were designed using ZiFIT  
453 Targeter Software for CRISPR/Cas9 Nucleases (Sander et al., 2010, Sander et al., 2007). The gRNA  
454 target sites were then blasted (NCBI Blastn) against the zebrafish genome to look for potential off target  
455 sites. gRNA oligos were annealed and phosphorylated, then cloned into the *pDR274* vector (Addgene)  
456 using the BsaI-HF restriction site. Positive clones were sequenced to confirm correct insertion. The  
457 gRNA-containing vector was linearized using DraI and purified by ethanol precipitation. The gRNA  
458 sequence was then transcribed to RNA using T7 polymerase and purified by phenol chloroform  
459 extraction. Cas9 mRNA was synthesized from the pT3TS vector (Addgene) using mMACHINE  
460 mMACHINE T3 Transcription Kit (ThermoFisher Cat# AM1348) and purified using phenol chloroform  
461 extraction. The injection mix was prepared as follows: 0.2 M potassium chloride, 0.15 ng  $\mu\text{L}^{-1}$  Cas9  
462 mRNA, 70ng  $\mu\text{L}^{-1}$  gRNA, and 10% phenol red in DEPC water. Embryos were injected with 1-3 nL of the  
463 injection mixture at the 1-cell stage. Founder fish were determined using T7E1 analysis (NEB), and

464 positive hits were sequenced to determine exact mutation. Founders from two different gRNA injection  
465 experiments containing different mutant alleles for *fip5a* and *fip5b* were selected and outcrossed for at  
466 least two generations before performing experiments.

467

#### 468 *Transmission Electron Microscopy*

469 Larvae were placed in 1-2% Tricaine for 10 minutes or until they were unresponsive to touch then  
470 decapitated immediately posterior to the otic vesicle. The larva body was placed in EM fix solution (0.1M  
471 sodium cacodylate, 4% paraformaldehyde, 4% glutaraldehyde, in PBS) at 4°C overnight, whereas the  
472 head was placed in lysis buffer and genotyped. The body was processed for EM by washing in 0.1M  
473 sodium cacodylate, then incubating tissue in 500uL of 1:1 osmium tetroxide to 0.1M sodium cacodylate  
474 for 2 hours. Tissue was washed with double distilled water, then incubated in 500uL 1:1 osmium  
475 tetroxide to imidazole (0.35g imidazole in 25mL sodium cacodylate pH to 7.4) for 30 minutes. Larvae  
476 turned brown at this point. Larvae were washed again in double distilled water then an ethanol  
477 dehydration series was performed (50% / 75% / 100%). Larvae were then incubated in 1:1 Epon to  
478 ethanol for 1 hour, then 2:1 Epon to ethanol overnight. The following day, larvae were embedded in  
479 100% Epon, which was replaced with fresh 100% Epon, and then baked for 2 days. Larvae were cut in  
480 half where the body narrows (see schematic in Figure 1C), and then 65 nm thick sections were cut and  
481 collected on formvar-coated copper slot grids. Sections cut in the anterior direction were designated the  
482 intestinal bulb region and in the posterior direction the midgut. Sections were imaged on a FEI Tecnai G2  
483 Biotwin Transmission Electron Microscope, run at 80 kV with a side-mount AMT XR80S-B digital camera.  
484 For TEM quantitation, a minimum of three biological replicates were used for each experiment and  
485 images were blinded prior to analysis.

486

#### 487 *RNA In Situ Hybridization*

488 Sense and antisense RNA probes were designed against both the coding sequence and 3' UTR region  
489 of zebrafish *fip5a* and *fip5b* genes. A PCR-based method with T7 sites at the end of the primers was  
490 used to amplify the probe DNA sequence from 8 day post fertilization wild-type fish cDNA (see Table 2).

491 The RNA probes were transcribed with the T7 polymerase and labeled using the DIG RNA labeling kit  
492 (Roche Cat # 11175025910). After the labeling reaction was complete, the probes were mixed with 1  $\mu$ l  
493 0.5M EDTA to stop the reaction, then 2  $\mu$ l 5M lithium chloride, and 75  $\mu$ l cold ethanol were added for  
494 purification by ethanol precipitation and the probe was resuspended in DEPC water. The RNA probe was  
495 checked by agarose gel electrophoresis, then mixed with an equal volume of formamide and stored at -  
496 80°C.

497

498 RNA in situ hybridization assays were conducted based on a modified version of a previously published  
499 protocol described by Hauptmann and Gerster (Hauptmann and Gerster, 2000). Larvae were fixed in 4%  
500 paraformaldehyde in DEPC PBS overnight at 4°C. Larvae were stored in MeOH at -20°C until use, when  
501 they were washed twice for five mins in DEPC-PBSTw (0.5% Tween-20 in PBS made with DEPC water).  
502 Pigmentation was bleached in a hydrogen peroxide solution (3% H<sub>2</sub>O<sub>2</sub>, 0.5% KOH in DEPC water) until  
503 larvae eyes turned brown (15-30 minutes). Larvae were then washed twice for 5 mins in DEPC-PBSTw,  
504 fixed for 20 minutes at room temperature in 4% PFA in DEPC-PBS, and washed again twice for 5 mins in  
505 DEPC-PBSTw. The larvae were digested with 0.1 mg/mL Proteinase K (Invitrogen Cat # 25530049) in  
506 DEPC-PBS for 17 minutes to permeabilize the larvae, then washed twice for 5 mins each wash in DEPC-  
507 PBSTw, followed by fixation for 20 minutes in 4% PFA, and again washed twice for 5 mins in DEPC-  
508 PBSTw. Larvae were incubated in 500  $\mu$ l Hybridization Media Block solution (50% formamide, 5x  
509 Saline-Sodium Citrate Buffer, 10  $\mu$ l/mL tRNA, 50 mg/mL heparin, 0.01M citric acid, and 0.5% Tween-20  
510 in DEPC H<sub>2</sub>O) for 1 hour at 70°C. The block was replaced with Hybridization Media containing 200 ng of  
511 the appropriate RNA probe, and the larvae were incubated at 70°C overnight. The following day, a series  
512 of progressive washes were performed for 10 mins each wash at 70°C: 200  $\mu$ l 100% HM without probe,  
513 300  $\mu$ l 66% HM / 33% 2x Saline-Sodium Citrate Buffer (SSC; Cellgro, Mediatech, Inc., Manassas, VA),  
514 300  $\mu$ l 33% HM / 66% 2x SSC, 1 mL 2x SSC, 1 mL 0.2x SSC, 1 mL 0.1 x SSC (this wash was  
515 performed twice), 1 mL DEPC-PBSTw. Another 10 min wash with DEPC-PBSTw was performed at room  
516 temperature, followed by an hour-long antibody block (2% sheep serum and 2 mg/mL BSA in DEPC-  
517 PBSTw). Anti-Digoxigenin-AP Fab fragments (Roche Applied Science, Indianapolis, IN) was incubated in

518 antibody block overnight at 4°C. Finally, four 15 min washes were conducted at room temperature in  
519 DEPC-PBSTw. Larvae were incubated in staining solution (0.1M Tris, pH 9.5, 0.25M MgCl<sub>2</sub>, 0.1M NaCl,  
520 0.5% Tween-20) for 15 minutes at room temperature. Thereafter, the larvae were moved to a staining  
521 dish, covered with 500 µL precipitating BM Purple AP Substrate (Roche Applied Science, Indianapolis,  
522 IN), and incubated at 37°C for 8 hours until staining was visible. The larvae were then washed twice for 5  
523 mins in PBS and imaged or processed for sectioning immediately.

524

#### 525 *Cell culture and immunohistochemistry*

526 MDCK II cells (ATCC) were cultured in DMEM with 10% FBS and penicillin/streptomycin. For polarized  
527 MDCK experiments, cells were plated on collagen type I-coated Transwell filters (Corning 3460) to reach  
528 confluency in 24 hours. Cells were then grown for three more days before transepithelial resistance  
529 measurements or fixation. Cells were fixed with 4% paraformaldehyde for 20 minutes at room  
530 temperature. Cells were blocked for 1-2 hours in block buffer (PBS, 0.1% Triton X-100, 10% normal  
531 donkey serum). Primary antibodies were diluted in block buffer and incubated overnight at room  
532 temperature. Cells were washed with PBSTx before adding secondary antibodies for 1-2 hours at room  
533 temperature. Cells were washed again before mounting in VectaShield and sealing with nail polish or  
534 mounting in Prolong Gold. Coverslips used for all experiments were #1.5 thickness.

535

#### 536 *Trans-epithelial resistance measurements*

537 MDCK cells were grown on collagen-coated transwell filters (see Cell Culture section) and resistance  
538 measurements were taken four days after plating with a Millicell ERS-2 Voltohmmeter (Millipore). Three  
539 measurements per well, one for each space between the plastic prongs of the filter holder, were  
540 averaged and subtracted from the average of the blank well containing a collagen-coated filter without  
541 any cells.

542

#### 543 *Generating MDCK and RPE-1 CRISPR knockout lines*

544 MDCK cells stably expressing Tet-inducible Cas9 (Dharmacon Edit-R inducible lentiviral Cas9 nuclease)



545 were grown in a 12-well dish to about 75% confluency before treatment with doxycycline at a final  
546 concentration of 1ug/mL for 24 hours to induce Cas9 expression. Cells were then transfected with  
547 crRNA:tracrRNA mix as described for DharmaFECT Duo co-transfection protocol (Horizon Discovery  
548 Cat# T-2010-xx). Transfected cells were incubated for 24 hours before trypsinizing and plating for  
549 individual clones. Individual clones were screened through genotyping PCR and sanger sequencing. All  
550 CRISPR gRNAs are listed in Table 2.

551 **REFERENCES**

- 552 AL-DARAJI, W. I., ZELGER, B., ZELGER, B. & HUSSEIN, M. R. 2010. Microvillous Inclusion  
553 Disease: A Clinicopathologic Study of 17 Cases from the UK. *Ultrastructural Pathology*, 34, 327-  
554 332.
- 555 ALVERS, A. L., RYAN, S., SCHERZ, P. J., HUISKEN, J. & BAGNAT, M. 2014. Single continuous  
556 lumen formation in the zebrafish gut is mediated by smoothed-dependent tissue remodeling.  
557 *Development*, 141, 1110-1119.
- 558 APODACA, G. & GALLO, L. I. 2013. Epithelial Polarity. In: NABI, I. R. (ed.) *Colloquium Series on*  
559 *Building Blocks of the Cell: Cell Structure and Function*. Morgan & Claypool Life Sciences.
- 560 COOPER, G. M. 2000. Intermediate Filaments.
- 561 EL-BROLOS, M. A., KONTARAKIS, Z., ROSSI, A., KUENNE, C., GUNTHER, S., FUKUDA, N.,  
562 KIKHI, K., BOEZIO, G. L. M., TAKACS, C. M., LAI, S. L., FUKUDA, R., GERRI, C.,  
563 GIRALDEZ, A. J. & STAINIER, D. Y. R. 2019. Genetic compensation triggered by mutant  
564 mRNA degradation. *Nature*, 568, 193-197.
- 565 HORGAN, C. P. & MCCAFFREY, M. W. 2009. The dynamic Rab11-FIPs. *Biochemical Society*  
566 *Transactions*, 37, 1032-1036.
- 567 IANCU, T. C., MAHAJNAH, M., MANOV, I. & SHAOUL, R. 2007. Microvillous inclusion disease:  
568 ultrastructural variability. *Ultrastruct Pathol*, 31, 173-88.
- 569 JEWETT, C. E. & PREKERIS, R. 2018. Insane in the apical membrane: Trafficking events mediating  
570 apicobasal epithelial polarity during tube morphogenesis. *Traffic*.
- 571 KNOWLES, B. C., ROLAND, J. T., KRISHNAN, M., TYSKA, M. J., LAPIERRE, L. A., DICKMAN, P.  
572 S., GOLDENRING, J. R. & SHUB, M. D. 2014. Myosin Vb uncoupling from RAB8A and  
573 RAB11A elicits microvillus inclusion disease. *The Journal of Clinical Investigation*, 124, 2947-  
574 2962.
- 575 LAPIERRE, L. A., KUMAR, R., HALES, C. M., NAVARRE, J., BHARTUR, S. G., BURNETTE, J. O.,  
576 PROVANCE, D. W., MERCER, J. A., BÄHLER, M. & GOLDENRING, J. R. 2001. Myosin Vb  
577 Is Associated with Plasma Membrane Recycling Systems. *Molecular Biology of the Cell*, 12,  
578 1843-1857.
- 579 MANGAN, A. J., SIETSEMA, D. V., LI, D., MOORE, J. K., CITI, S. & PREKERIS, R. 2016. Cingulin  
580 and actin mediate midbody-dependent apical lumen formation during polarization of epithelial  
581 cells. *Nat Commun*, 7, 12426.
- 582 MOOSEKER, M. S., BONDER, E. M., CONZELMAN, K. A., FISHKIND, D. J., HOWE, C. L. &  
583 KELLER, T. C. 1984. Brush border cytoskeleton and integration of cellular functions. *The*  
584 *Journal of Cell Biology*, 99, 104s-112s.
- 585 MÜLLER, T., HESS, M. W., SCHIEFERMEIER, N., PFALLER, K., EBNER, H. L., HEINZ-ERIAN, P.,  
586 PONSTINGL, H., PARTSCH, J., RÖLLINGHOFF, B., KÖHLER, H., BERGER, T.,  
587 LENHARTZ, H., SCHLENCK, B., HOUWEN, R. J., TAYLOR, C. J., ZOLLER, H., LECHNER,  
588 S., GOULET, O., UTERMANN, G., RUEMMELE, F. M., HUBER, L. A. & JANECKE, A. R.  
589 2008. MYO5B mutations cause microvillus inclusion disease and disrupt epithelial cell polarity.  
590 *Nature Genetics*, 40, 1163-1165.
- 591 NG, A. N. Y., DE JONG-CURTAIN, T. A., MAWDSLEY, D. J., WHITE, S. J., SHIN, J., APPEL, B.,  
592 DONG, P. D. S., STAINIER, D. Y. R. & HEATH, J. K. 2005. Formation of the digestive system  
593 in zebrafish: III. Intestinal epithelium morphogenesis. *Developmental Biology*, 286, 114-135.
- 594 PHILLIPS, A. D., JENKINS, P., RAAFAT, F. & WALKER-SMITH, J. A. 1985. Congenital microvillous  
595 atrophy: specific diagnostic features. *Arch Dis Child*, 60, 135-40.
- 596 PHILLIPS, A. D. & SCHMITZ, J. 1992. Familial microvillous atrophy: a clinicopathological survey of  
597 23 cases. *J Pediatr Gastroenterol Nutr*, 14, 380-96.
- 598 PREKERIS, R., DAVIES, J. M. & SCHELLER, R. H. 2001. Identification of a novel Rab11/25 binding  
599 domain present in Eferin and Rip proteins. *J Biol Chem*, 276, 38966-70.

- 600 ROSSI, A., KONTARAKIS, Z., GERRI, C., NOLTE, H., HÖLPER, S., KRÜGER, M. & STAINIER, D.  
601 Y. R. 2015. Genetic compensation induced by deleterious mutations but not gene knockdowns.  
602 *Nature*, 524, 230-233.
- 603 RUEMMELE, F. M., MÜLLER, T., SCHIEFERMEIER, N., EBNER, H. L., LECHNER, S., PFALLER,  
604 K., THÖNI, C. E., GOULET, O., LACAILE, F., SCHMITZ, J., COLOMB, V., SAUVAT, F.,  
605 REVILLON, Y., CANIONI, D., BROUSSE, N., DE SAINT-BASILE, G., LEFEBVRE, J.,  
606 HEINZ-ERIAN, P., ENNINGER, A., UTERMANN, G., HESS, M. W., JANECKE, A. R. &  
607 HUBER, L. A. 2010. Loss-of-function of MYO5B is the main cause of microvillus inclusion  
608 disease: 15 novel mutations and a CaCo-2 RNAi cell model. *Human Mutation*, 31, 544-551.
- 609 RUEMMELE, F. M., SCHMITZ, J. & GOULET, O. 2006. Microvillous inclusion disease (microvillous  
610 atrophy). *Orphanet J Rare Dis*, 1, 22.
- 611 SANDER, J. D., MAEDER, M. L., REYON, D., VOYTAS, D. F., JOUNG, J. K. & DOBBS, D. 2010.  
612 ZiFiT (Zinc Finger Targeter): an updated zinc finger engineering tool. *Nucleic Acids Res*, 38,  
613 W462-8.
- 614 SANDER, J. D., ZABACK, P., JOUNG, J. K., VOYTAS, D. F. & DOBBS, D. 2007. Zinc Finger  
615 Targeter (ZiFiT): an engineered zinc finger/target site design tool. *Nucleic Acids Res*, 35, W599-  
616 605.
- 617 SIDHAYE, J., PINTO, C. S., DHARAP, S., JACOB, T., BHARGAVA, S. & SONAWANE, M. 2016.  
618 The zebrafish goosepimples/myosin Vb mutant exhibits cellular attributes of human microvillus  
619 inclusion disease. *Mechanisms of Development*, 142, 62-74.
- 620 STENMARK, H. 2009. Rab GTPases as coordinators of vesicle traffic. *Nat Rev Mol Cell Biol*, 10, 513-  
621 25.
- 622 VOGEL, G. F., KLEE, K. M., JANECKE, A. R., MULLER, T., HESS, M. W. & HUBER, L. A. 2015.  
623 Cargo-selective apical exocytosis in epithelial cells is conducted by Myo5B, Slp4a, Vamp7, and  
624 Syntaxin 3. *J Cell Biol*, 211, 587-604.
- 625 WEIS, V. G., KNOWLES, B. C., CHOI, E., GOLDSTEIN, A. E., WILLIAMS, J. A., MANNING, E. H.,  
626 ROLAND, J. T., LAPIERRE, L. A. & GOLDENRING, J. R. 2016. Loss of MYO5B in mice  
627 recapitulates Microvillus Inclusion Disease and reveals an apical trafficking pathway distinct to  
628 neonatal duodenum. *Cell Mol Gastroenterol Hepatol*, 2, 131-157.
- 629 WILLENBORG, C., JING, J., WU, C., MATERN, H., SCHAACK, J., BURDEN, J. & PREKERIS, R.  
630 2011. Interaction between FIP5 and SNX18 regulates epithelial lumen formation. *The Journal of*  
631 *Cell Biology*, 195, 71-86.
- 632

634 Figure 1

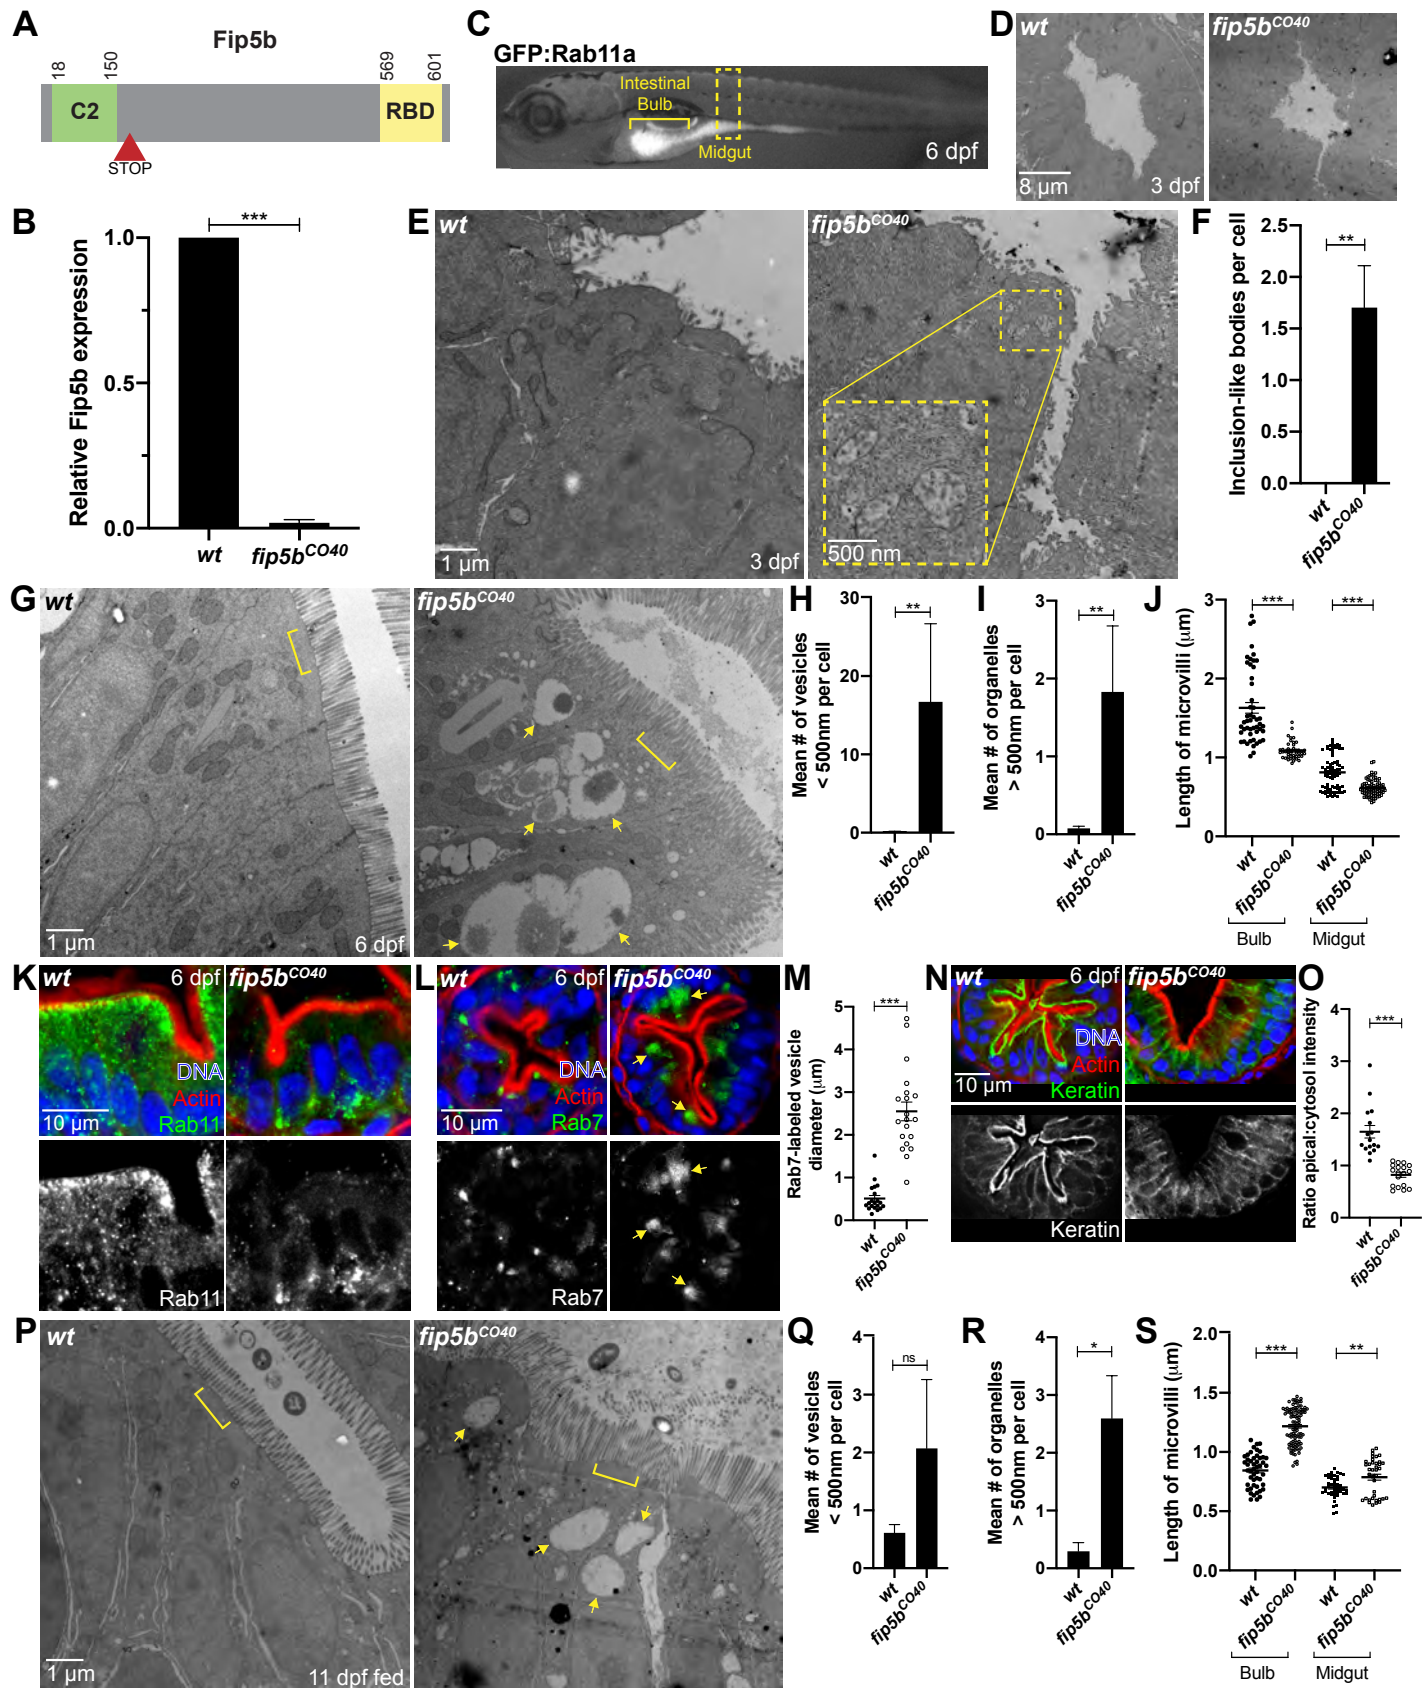



636 Figure 2

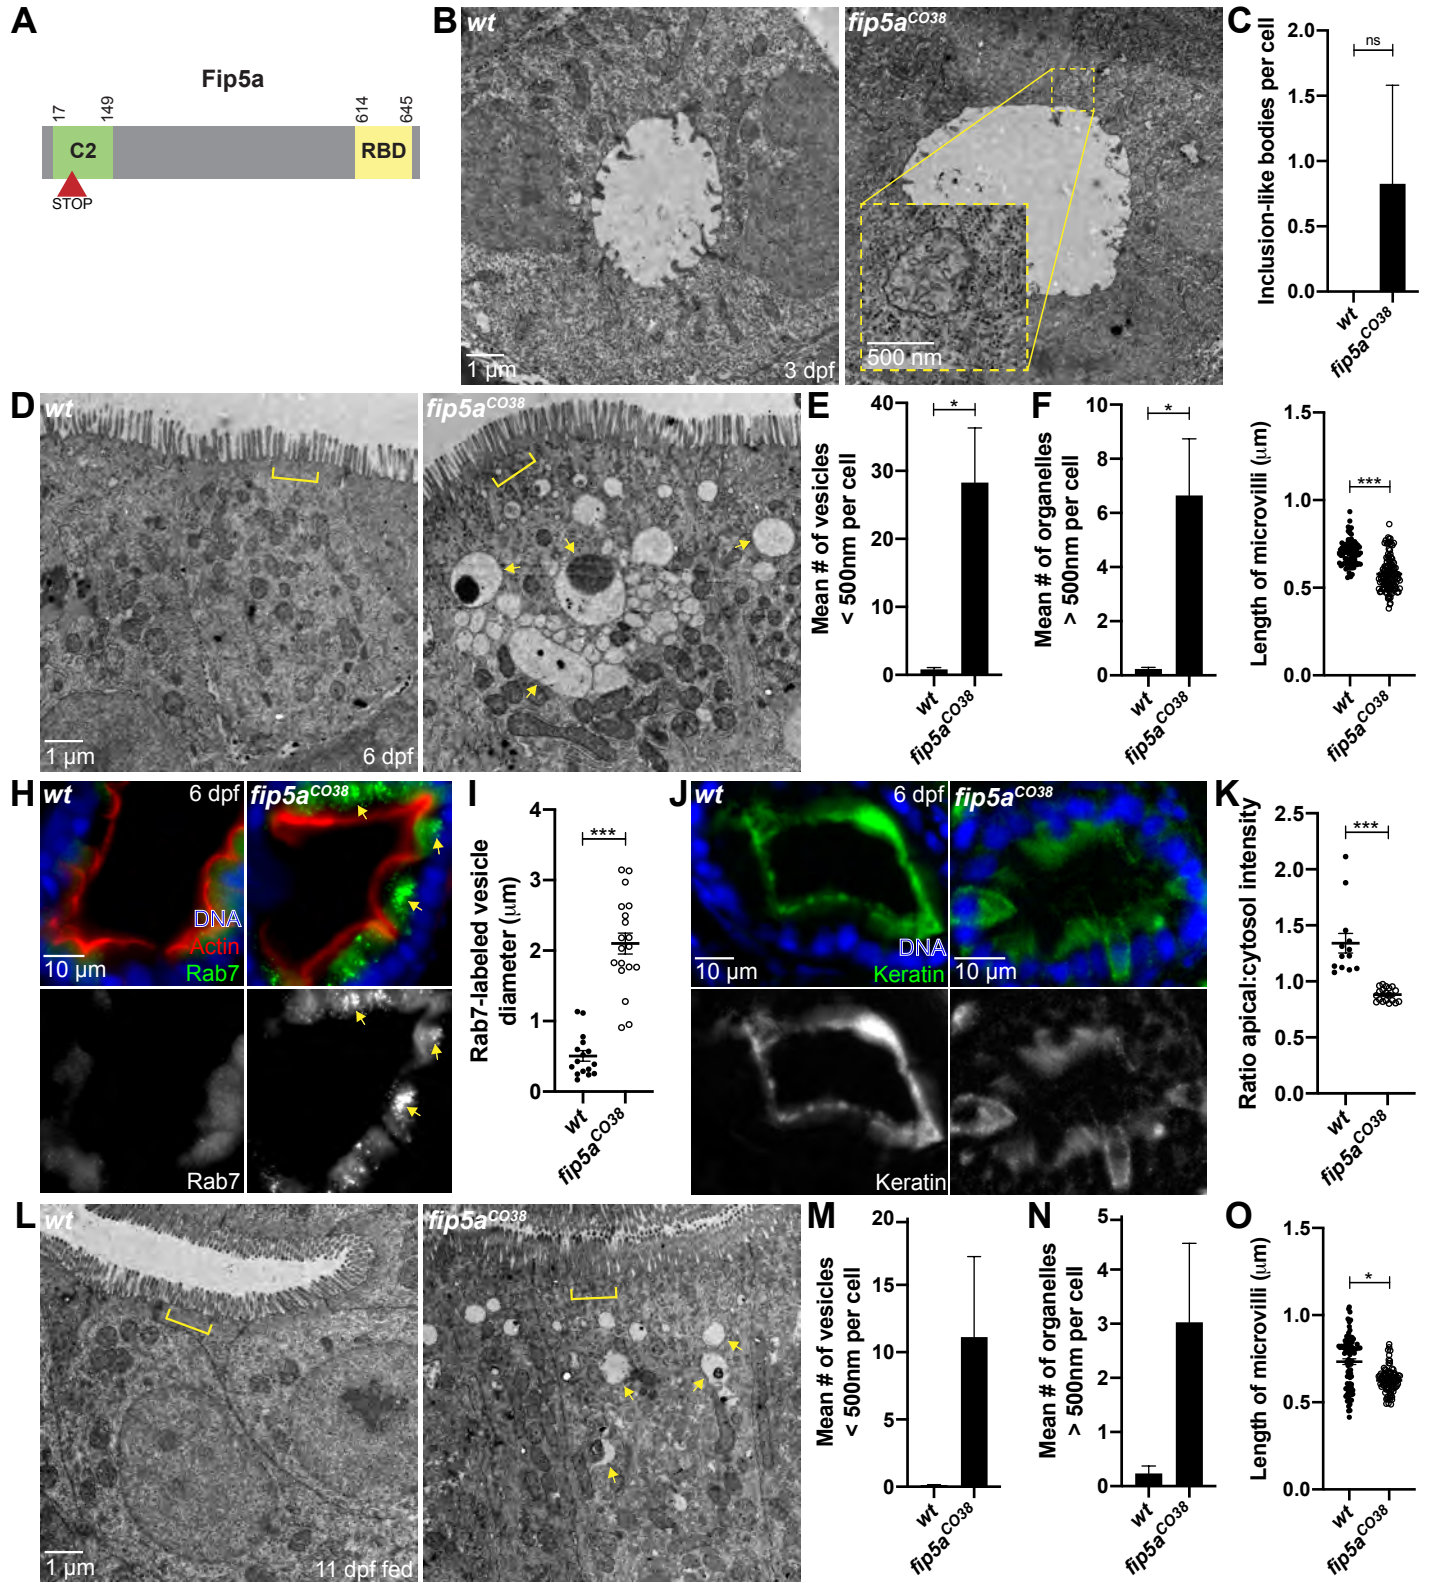

637  
638

639 Figure 3

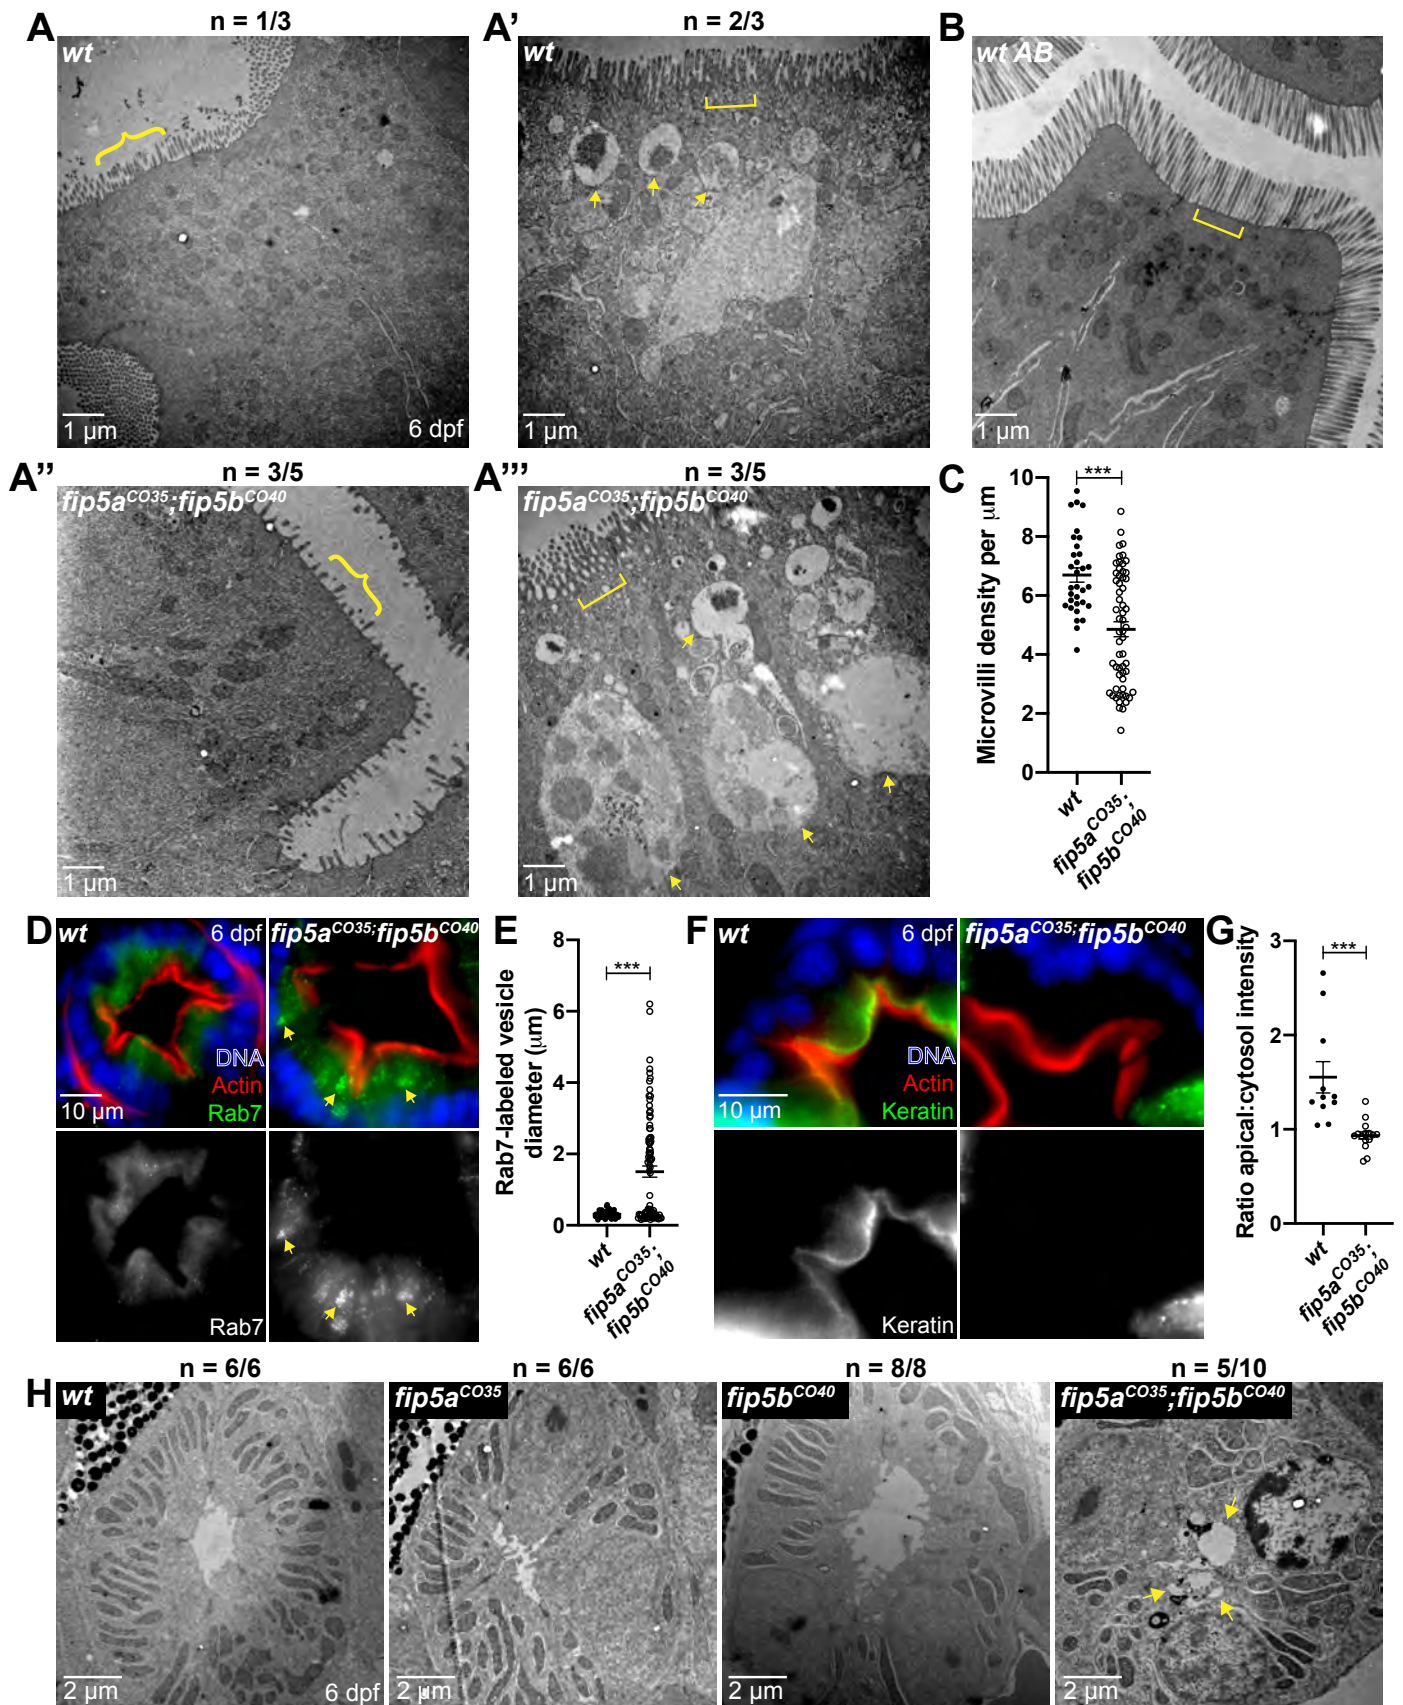



641 Figure 4

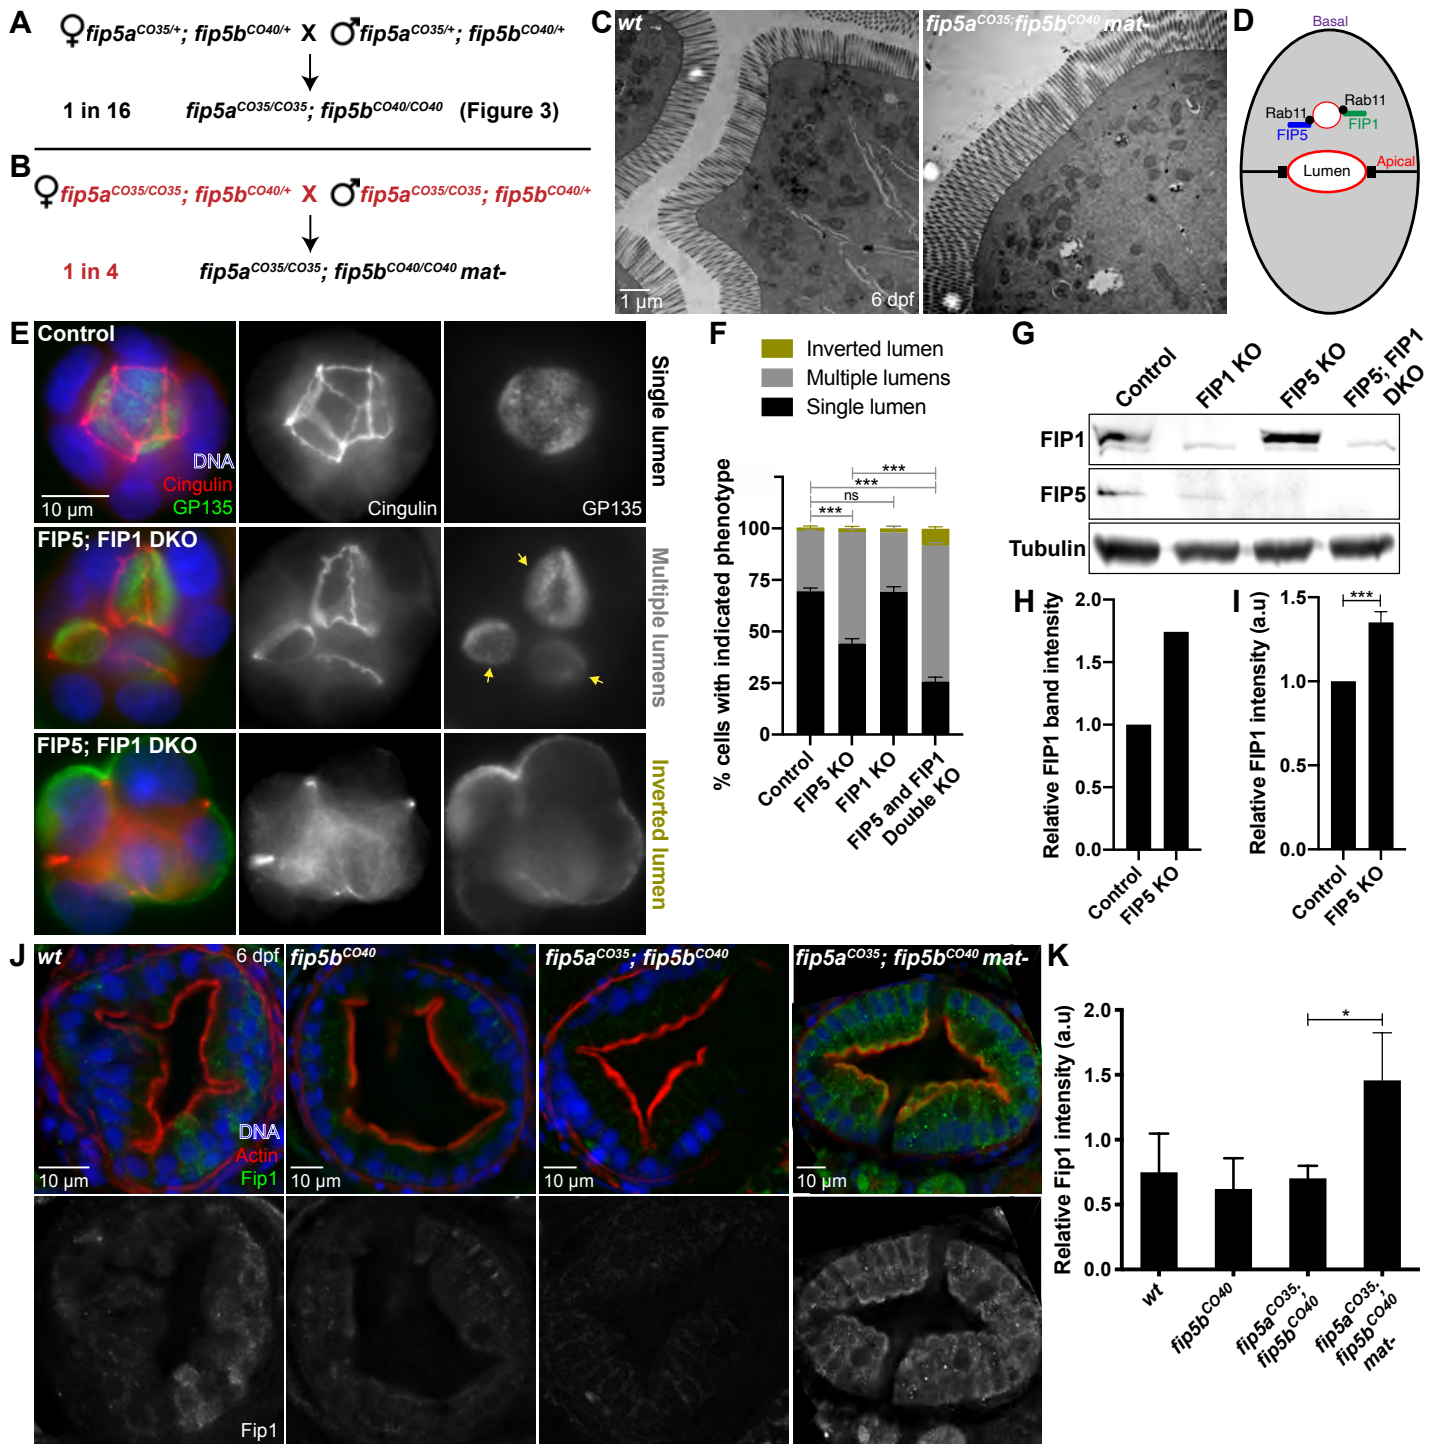

642  
 643



644 Supplemental Figure 1

**A**

|                |     |                                                                 |
|----------------|-----|-----------------------------------------------------------------|
| HumanFIP5      | 1   | MALVRGAEPAAAGPSRWLPTHVQVTVLRARGLRGKSSGAGSTSDAYTVIQVGREKYSTSVV   |
| DogFIP5        | 1   | MALVRGAEPAPGPSRWLPTHVQVTVLRARGLRGKSSGAGSTSDAYTVIQVGREKYSTSVV    |
| ZebrafishFip5a | 1   | MSLAKS-D---EDQRWVPTHVQVTVLRARGLRAKG--KHGTSDVYTI IQLGKEKYSTCVM   |
| ZebrafishFip5b | 1   | MPLISLDD---EEQRWVPTHVNVTVLRARALRTKG--KQGSRYVYTI IQVGKEKYTTGLV   |
| HumanFIP5      | 61  | EKTHGCPWEWECCSFELPPGALDGLLRAQAEADAGPAPWAASSAAACELVLTMMHRS LIGV  |
| DogFIP5        | 61  | EKTPGCPWEWECCSFELPPGALDGLLRAQAEADAGSAPWAAGSAAACELVLTMMHRS LIGV  |
| ZebrafishFip5a | 55  | EKTT-DPEWGECCSFELQPGILEEEGR-----DAY---PPGSGDLT LTMHRA LIGL      |
| ZebrafishFip5b | 56  | EKAE-EPQWGECA FELLPGLLEAGGT-----SAY---PPGSSNLVFTVMHRV LIGL      |
| HumanFIP5      | 121 | DKFLGQATVALDEVFGAGRAQHTQWYKLSKPKGKKEKERGETEVTIQFTRNNLSASMF DL   |
| DogFIP5        | 121 | DKFLGQATVALDEVFGAGRAQHTQWYKLSKAGKKEKERGETEVTIQFTRNNLSASMF DL    |
| ZebrafishFip5a | 103 | DVFLGQAVLPLHKAFQDRKSKKNEWHRLHSKTGKKEKERGELQLSVQFTRNHLTASMY DL   |
| ZebrafishFip5b | 104 | DVFLGQTI VPLDKVFQEGT CPRNEWLKLHSKAGRKEKERGELQVTIQFTRNNMTASMY DL |
| HumanFIP5      | 181 | SMKDKPRS PF SKIRDKMKGKKKY-DLESASAILPSSA-----I-ED                |
| DogFIP5        | 181 | SMKDKPRS PF SKIKDKMKGKKKF-DLESASAILPSSA-----L-ED                |
| ZebrafishFip5a | 163 | SMKDKPRSAFKLREMRRAKRRPAEEDSSSAIVPGGYGALARMRGRLP-S DGGGEEDYED    |
| ZebrafishFip5b | 164 | TVKDKPRSAFGKLRVTKGKRD--VESSSAVLPGRY AALSGSVGPPFAGDGGSYEA-SE     |
| HumanFIP5      | 220 | PDLGSLGKMGKAKGFLLRNKLRKSSLTQSNTSLGSDSTLSSASGLAYQGP GA----ELL    |
| DogFIP5        | 220 | PELGSLGKMGKAKGFLLRNKLRKSSLTQSNTSLGSDSTLSSASGLAYQGP GT----ELL    |
| ZebrafishFip5a | 222 | -DEGGEARRSKMRSFFLRGLRKSSTRSSSLGSESSSESSSRGGSLSPTAGISVVVSDL      |
| ZebrafishFip5b | 221 | -EDGVEEHRSKVKDFFLKGLRKNSDTRSCSSLASDSSMASAGDPFIPV-----E I        |
| HumanFIP5      | 276 | TRSPRSRSSLSTEGGRDQAQSPK--LFTHKRTYSDEANQMRVAPPRLDLQGH LDA---     |
| DogFIP5        | 276 | THSPRSRSSLSTEGGRDSTQSPK--LLTHKRTYSDEASQMRVAPPRSLDLQGH LDA---    |
| ZebrafishFip5a | 281 | SNSPNSNLTADNSPEHTVAPSPQVSPVRHV MYD----ISLPVPHS-----MMSDNDT      |
| ZebrafishFip5b | 272 | PRTPIYSSRVMPEFRMDTEEAIK--VMTHKRAHSDEASKITCVP RPS-----PAVEN---   |
| HumanFIP5      | 331 | -ASRSLCVNGSHIYNEEPQGPVR-----HRSSISGSL-----                      |
| DogFIP5        | 331 | -ASRSLCVNGSHIYNEEPQAPLR-----HRSSISGPF-----                      |
| ZebrafishFip5a | 331 | PILLPSVCVNGNPVETS---PLTHHPTLVLQH-PQESTKPI TQSGQPQATKLPKPE       |
| ZebrafishFip5b | 322 | -LSQSTLCINGSHIYSSEPVSPKSP--SAIPAKRSLLEKCA-----                  |
| HumanFIP5      | 363 | -----PSSGSLQAVSRFSEEGPR---STDDTWPRGSRSNSSS                      |
| DogFIP5        | 363 | -----PPSSSLHVSFRPAEEGSR---PTDSSGGRSRSTSSS                       |
| ZebrafishFip5a | 386 | KSQESKPRPEPRLPALGVLQKGSLSLSLQNLRSRQ-GKEKQNGGPVD---GRRWSFDK PGE  |
| ZebrafishFip5b | 360 | -----PLSRSLQNLTRR-GEDSQK---SD---GRRWSIDKSKK                     |
| HumanFIP5      | 398 | EAVLQGEELSQAQKVLAPGASHPGEEGARLPEGKPVQV--ATPIVASSEVAEKEGARK      |
| DogFIP5        | 398 | EMLPGQEELSQAQKVLATGTSRSGEEGARLPEGKPVQV--ATPLVASSEVAEKEGARK      |
| ZebrafishFip5a | 442 | E-----EKA AIVA-ALEHAGR--VTDEPVNETVIRAG-----ETE                  |
| ZebrafishFip5b | 391 | E-----DLETNAA-QSQTQGSTVVDGKPVQA--AGAVD-----VLD                  |
| HumanFIP5      | 456 | EERKPRMGLFH HHHQGLSRSELGRRSSLGEGGPI L-GASPHHSSSGEEKAKSSWFGLRE   |
| DogFIP5        | 456 | EERKPRMGLFH HHHQGLSRSELGRRSSLGEGGPTQ-GASPHHSSSGEEKAKSSWFGLRE    |
| ZebrafishFip5a | 474 | TQGKRRGLFSH-----GKGDSACKG--PITSKEETEHAQPLVEVKHKGFSS--           |
| ZebrafishFip5b | 424 | KGKLRKTLFSS-----GRSDSLPAK--P-----EQGQVSA PVEGRRGWFGS--          |
| HumanFIP5      | 515 | AKDPTQKPSPPHVKPLSAAPVEGSPDRKQSRSSLSIALSSGLEKLT V-TSGSIQPVTQA    |
| DogFIP5        | 515 | AKEPTQKPSPPHVKPLSAASLEGSPDKQSRSSLSIALSSGLEKLT V-TSGSVQPVAPA     |
| ZebrafishFip5a | 520 | -KDSHSKPSPPHVKPLTPPDE---KRSEGR-----SVLEKLS TIHSGRSDA---         |
| ZebrafishFip5b | 465 | -GDSQNKPSPPHVKPLTNNTLQGE-KKAESR-----SVLEKLS TINPGRSALATTA       |
| HumanFIP5      | 574 | PQAQGMVDTKRLKDSAVLDQSAKYHLTHDELISLLLQREREL SQRDE-----           |
| DogFIP5        | 574 | PHVGTVDTKRLKDSGVLDQSAKYHLTHDELISLLLQREREL SQRDE-----            |
| ZebrafishFip5a | 563 | -----DKKPLVEGGG SYHLNHSSELVNL L IQRDMELRQERE EYKRGMLLEKR        |
| ZebrafishFip5b | 515 | EEE-----KQQLS LMEARAHYQNM TMEIALLLQQELEIKKQRAETE VQVVMLEKR      |
| HumanFIP5      | 622 | -----HVQELESYIDRLLVRIMETSPTLLQIPGPPK                            |
| DogFIP5        | 622 | -----HVQELESYIDRLLVRIMETSPTLLQIPDPPK                            |
| ZebrafishFip5a | 611 | ETDLKKMKLLIKDLEDYIDTLVRIMEQTP TLLQVRFK-MK                       |
| ZebrafishFip5b | 567 | DAELKKMKVQVRDLEDYIDKLLVRIMEQTP TLLQVRGR-LK                      |

**B Fip5b Exon 2**  
 WT Fip5b: WLKLSKAGRKEKERGELQVTIQFTRNNMTASMYDLTVKDKPRSAFGKLRVTKGKRDVESSAVLPGRYA  
 ALSGSVGPPFAGDGGSYEASEEDGVEEHRSKVKDFFLKGLRKNSDTRSCSSLASD  
 Fip5b<sup>CO40</sup>: ALSGSGVPPFAGDGGSYEASEEDGVEEHRSGVVEEVRSKTSFStop  
 Fip5b<sup>CO43</sup>: ALSGSGVPPFAGDGGSYEASEEDGVEEHRSKTSFStop

**C Fip5a Exon 1**  
 WT Fip5a: MSLAKSDEDQRWVPTHVQVTVLRARGLRAKGKHGTSDVYTIQLGKEKYSTCVMKTTDPEWGECCSFEL  
 Fip5a<sup>CO35</sup>: MSLAKSDEDQRWVPTHVQVTVLRARGLREGQTRHQRRVHHHPAGQGEILHVRDGEDYRSGMGRGMLVStop  
 Fip5a<sup>CO38</sup>: MSLAKSDEDQRWVPTHVQVTVLRARGLRVTStop

646 Supplemental Figure 2

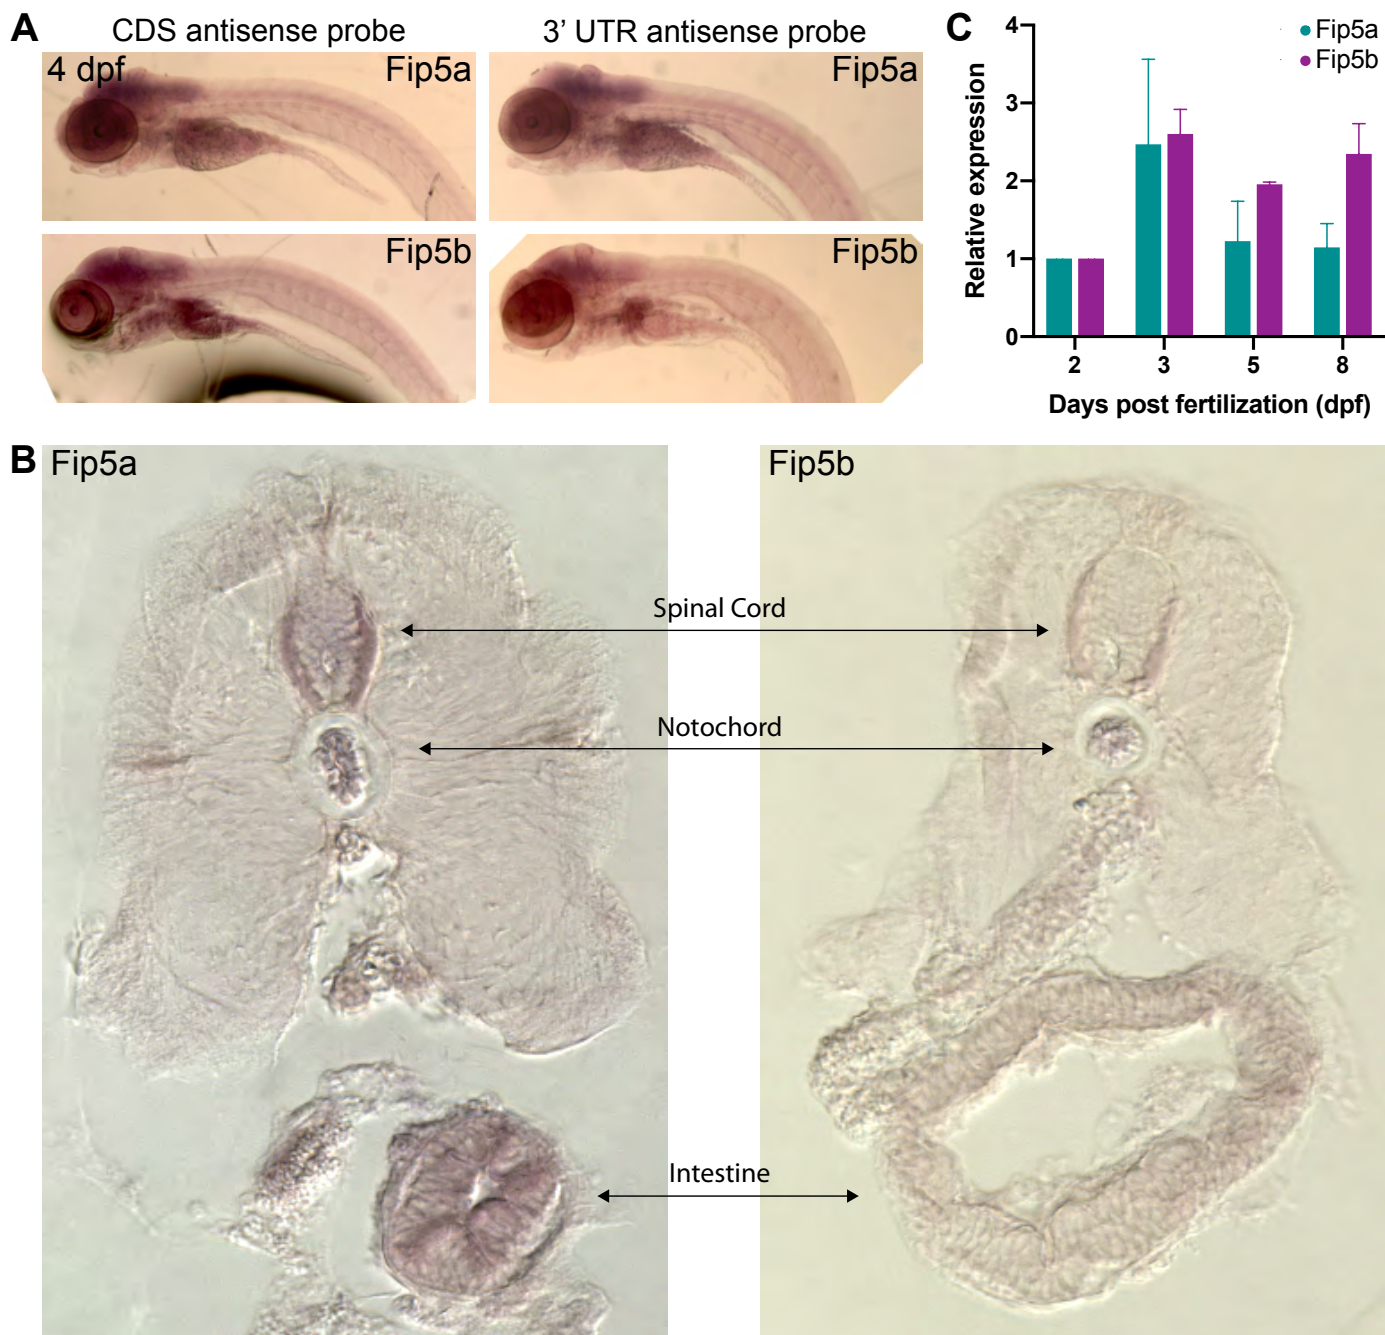

647  
648

649 Supplemental Figure 3

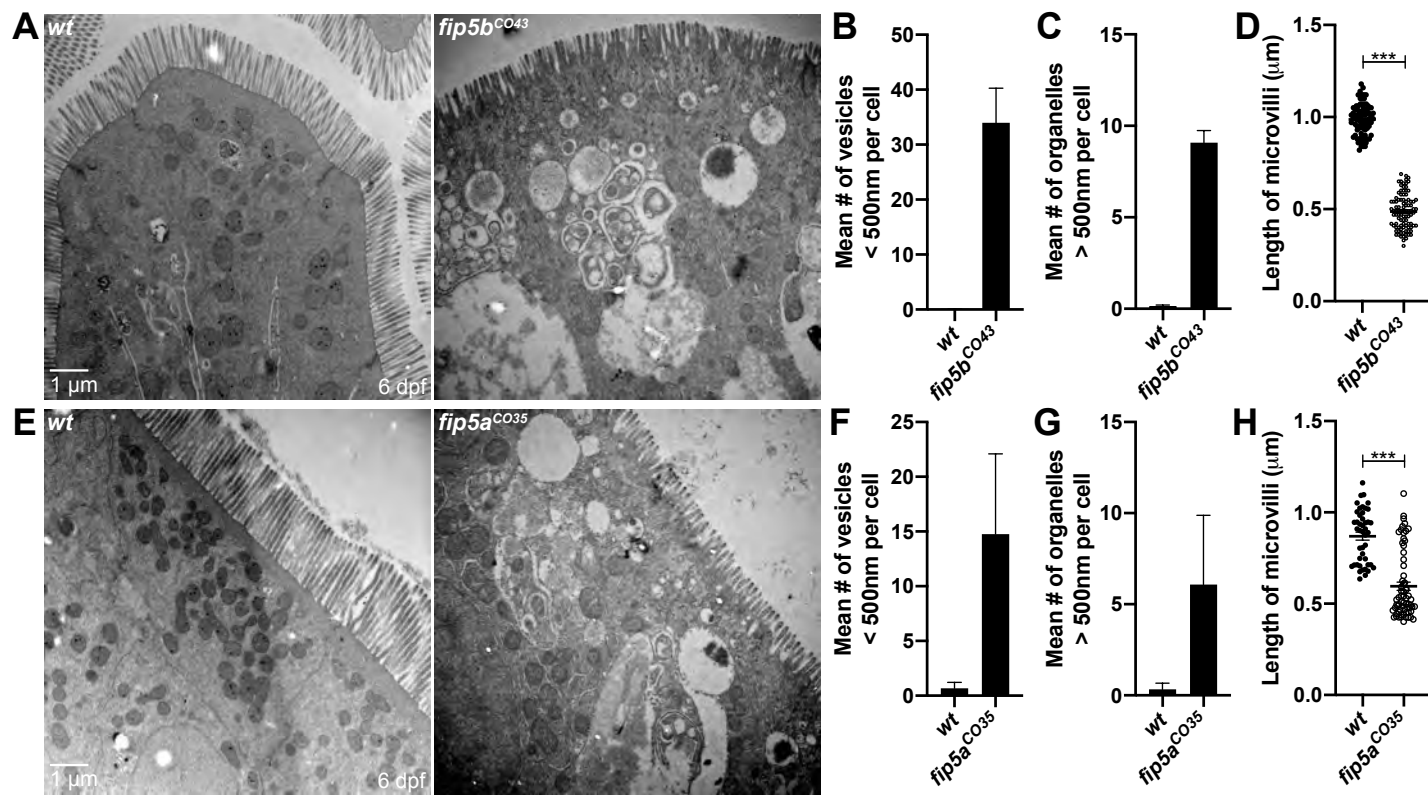

650  
651



652 Supplemental Figure 4

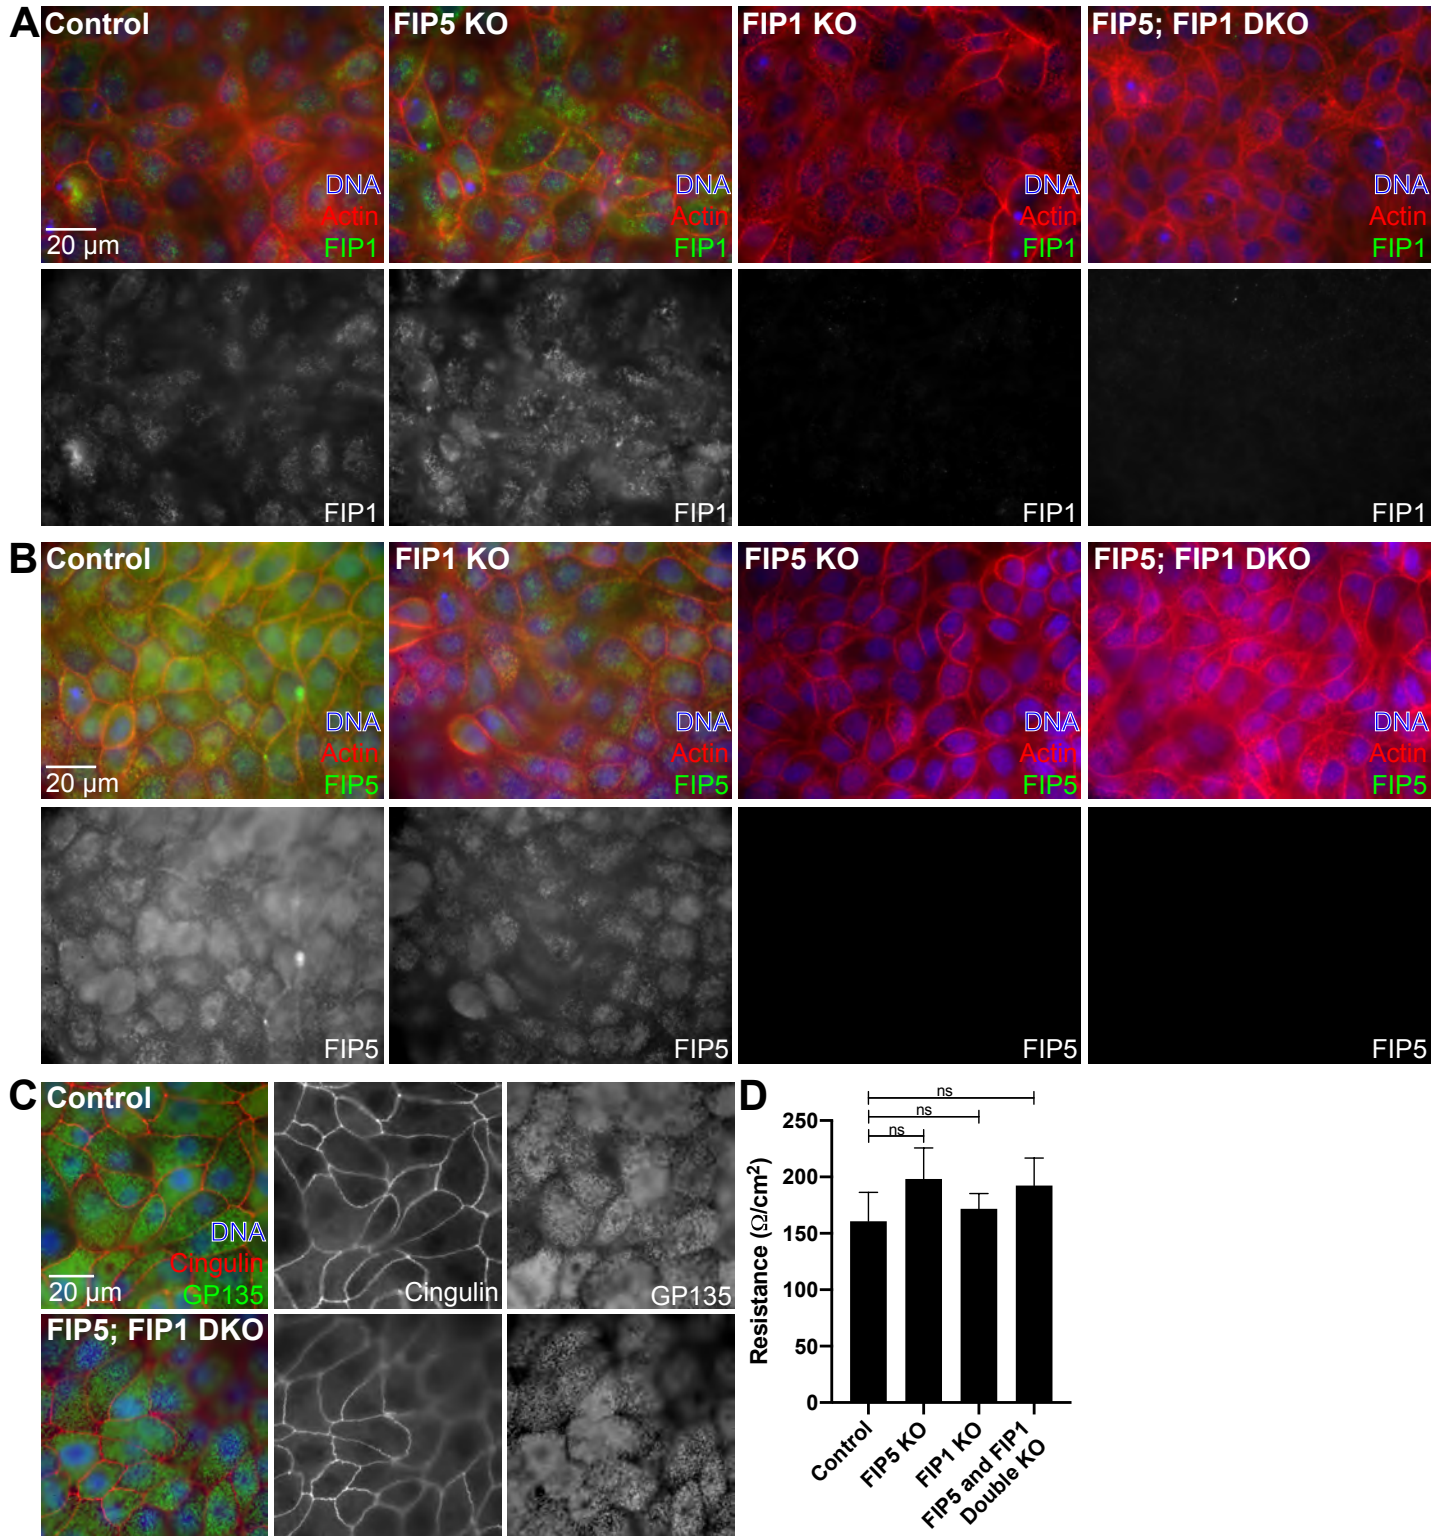

653  
654
